# Supplementary material for: Compensation effects and relation between the activation energy of spin transition and the hysteresis loop width for an iron(ii) complex
Source: Royal Society of Chemistry journal article supplement (doi:10.1039/c6cp01892k), 2016-01-01
Supplement: c6cp01892k1.pdf [file c6cp01892k1.pdf]

*Electronic Supplementary Information*

## **Compensation effects and relation between the activation energy of spin transition and the hysteresis loop width for an iron(II) complex**

Mark B. Bushuev,<sup>\*a,b</sup> Denis P. Pishchur<sup>a</sup>, Elena B. Nikolaenkova<sup>c</sup> and Viktor P. Krivopalov<sup>c</sup>

<sup>a</sup> Nikolaev Institute of Inorganic Chemistry, Siberian Branch of Russian Academy of Sciences, 3, Acad. Lavrentiev Ave., Novosibirsk, 630090, Russia, E-mail: bushuev@niic.nsc.ru, mark.bushuev@gmail.com; Fax: +7 383 330 94 89; Tel: +7 383 316 51 43.

<sup>b</sup> Novosibirsk State University, 2, Pirogova str., Novosibirsk, 630090, Russia.

<sup>c</sup> N. N. Vorozhtsov Novosibirsk Institute of Organic Chemistry, Siberian Branch of Russian Academy of Sciences, 9, Acad. Lavrentiev Ave., Novosibirsk, 630090, Russia.

## Table of contents

|                                                                                                                                                   |     |
|---------------------------------------------------------------------------------------------------------------------------------------------------|-----|
| <b>Fig. S1</b> Typical DSC curves for the $1^{A/HS} \rightarrow 1^{A/LS}$ transition.....                                                         | S3  |
| <b>Fig. S2</b> DSC curves for the $1^{A/LS} \rightarrow 1^{A/HS}$ and $1^{A/HS} \rightarrow 1^{A/LS}$ transitions, a separate sample.....         | S3  |
| <b>Fig. S3</b> X-ray powder pattern of the product (the phase $1^B$ ) after cycle 7.....                                                          | S3  |
| <b>Fig. S4</b> Evolution of the enthalpy of the $1^{A/LS} \rightarrow 1^{A/HS}$ transition on multiple cycling.....                               | S4  |
| <b>Fig. S5</b> Evolution of the entropy of the $1^{A/LS} \rightarrow 1^{A/HS}$ transition on multiple cycling.....                                | S4  |
| <b>Fig. S6</b> Correlation between the $T_{\text{onset}} \uparrow$ and the entropy of the $1^{A/LS} \rightarrow 1^{A/HS}$ spin transition.....    | S5  |
| <b>Fig. S7</b> Correlation between the hysteresis loop width and the entropy of the $1^{A/LS} \rightarrow 1^{A/HS}$ transition....                | S5  |
| <b>Fig. S8</b> Evolution of the $\log K_{\text{cat}}$ for the $1^{A/LS} \rightarrow 1^{A/HS}$ transition on multiple cycling (the CnB model)..... | S6  |
| <b>Fig. S9</b> Evolution of the reaction order, $n$ , for the $1^{A/LS} \rightarrow 1^{A/HS}$ transition on multiple cycling .....                | S6  |
| <b>Fig. S10</b> The Eyring plot for the samples <b>14-1, 9, 4, 5-1, 7, 3</b> and <b>1</b> .....                                                   | S7  |
| <b>Fig. S11</b> The enthalpy-entropy compensation for the $H^*$ and $S^*$ values derived from the Eyring plot.....                                | S7  |
| <b>Fig. S12</b> The enthalpy-entropy compensation, error bars are shown.....                                                                      | S7  |
| <b>Fig. S13</b> Far IR spectrum of the phase $1^{A/LS}$ .....                                                                                     | S8  |
| Activation energy.....                                                                                                                            | S9  |
| <b>Table S1</b> Kinetic data for the $1^{A/LS} \rightarrow 1^{A/HS}$ spin transition used for statistical treatment.....                          | S29 |

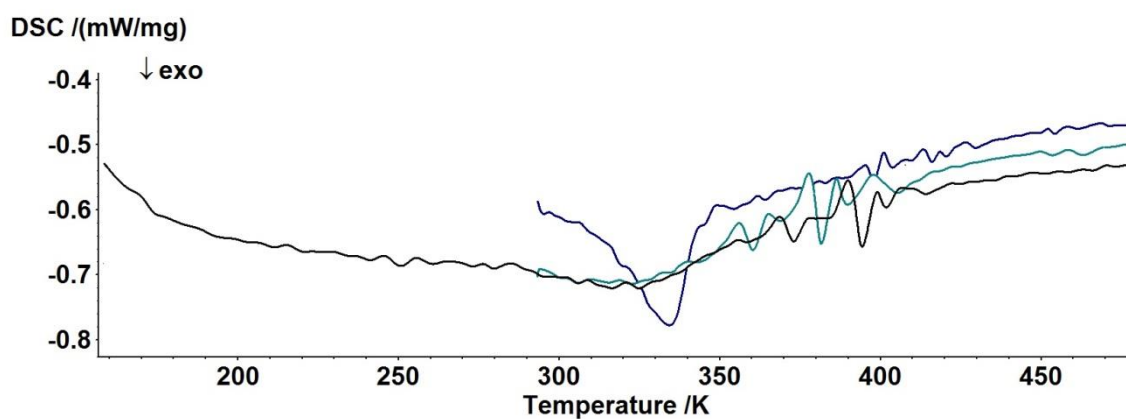

**Fig. S1** Typical DSC curves for the  $1^{A/HS} \rightarrow 1^{A/LS}$  transition (cycle 6 (blue), cycle 29 (green) and cycle 31 (black)).

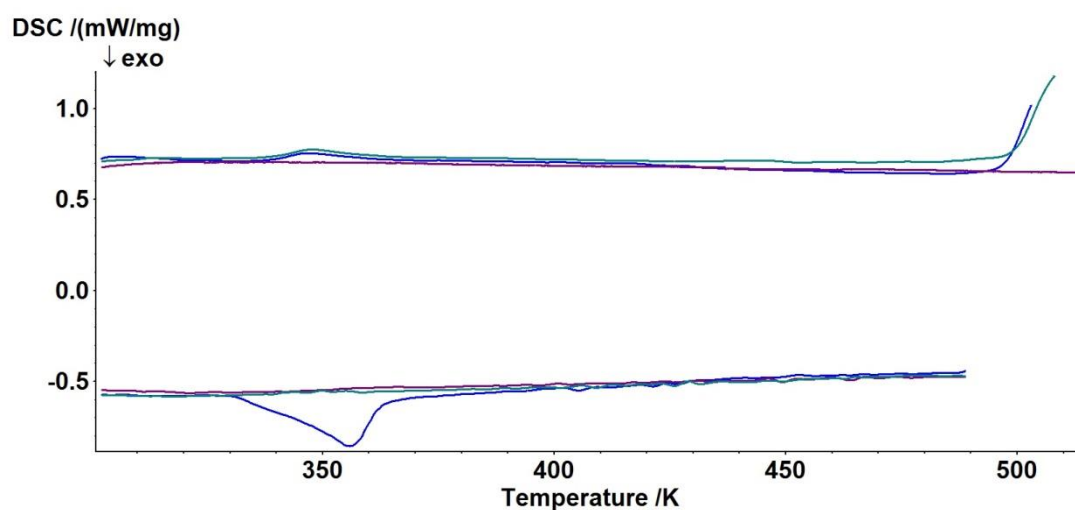

**Fig. S2** DSC curves for the  $1^{A/LS} \rightarrow 1^{A/HS}$  and  $1^{A/HS} \rightarrow 1^{A/LS}$  transitions, a separate sample, cycle 5 (blue, 300 – 500 – 300 K), cycle 6 (green, 300 – 505 – 300 K) and cycle 7 (violet, 300 – 510 – 300 K).

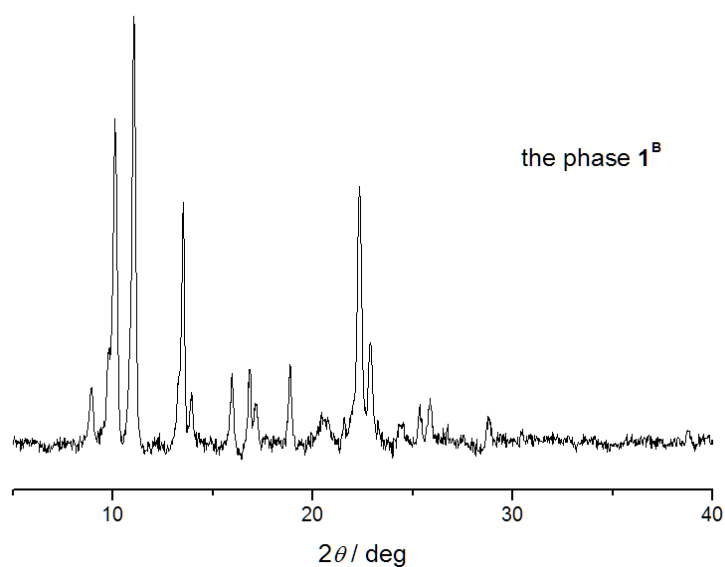

**Fig. S3** X-ray powder pattern of the product (the phase  $1^B$ ) after cycle 7 (see Fig. S2).

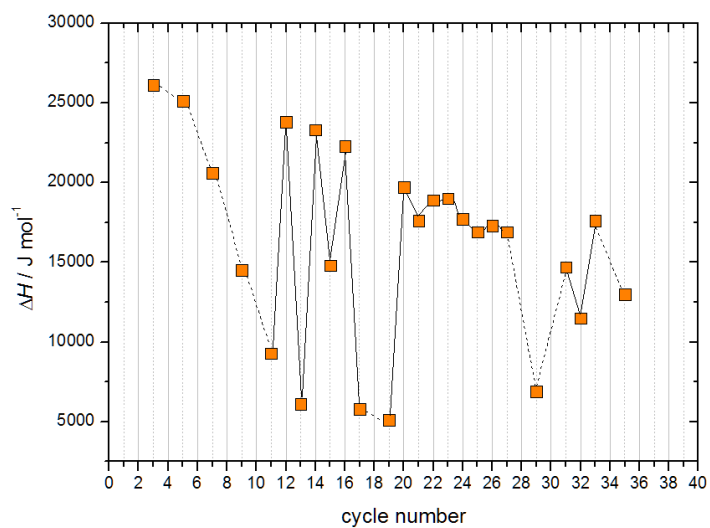

**Fig. S4** Evolution of the enthalpy of the  $1^{A/LS} \rightarrow 1^{A/HS}$  transition on multiple cycling.

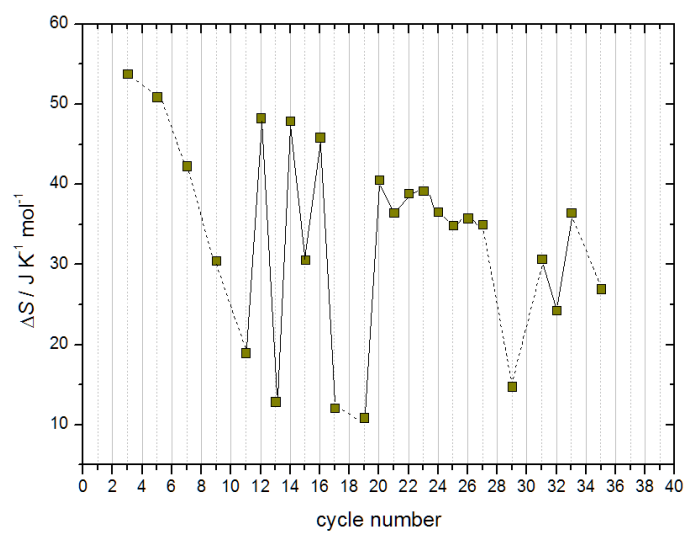

**Fig. S5** Evolution of the entropy of the  $1^{A/LS} \rightarrow 1^{A/HS}$  transition on multiple cycling.

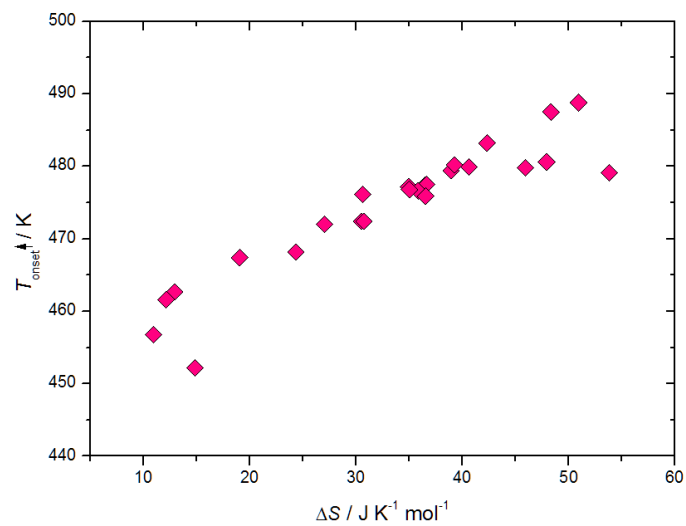

**Fig. S6** Correlation between the  $T_{\text{onset}}^{\uparrow}$  and the entropy of the  $\mathbf{1}^{\text{A/LS}} \rightarrow \mathbf{1}^{\text{A/HS}}$  spin transition.

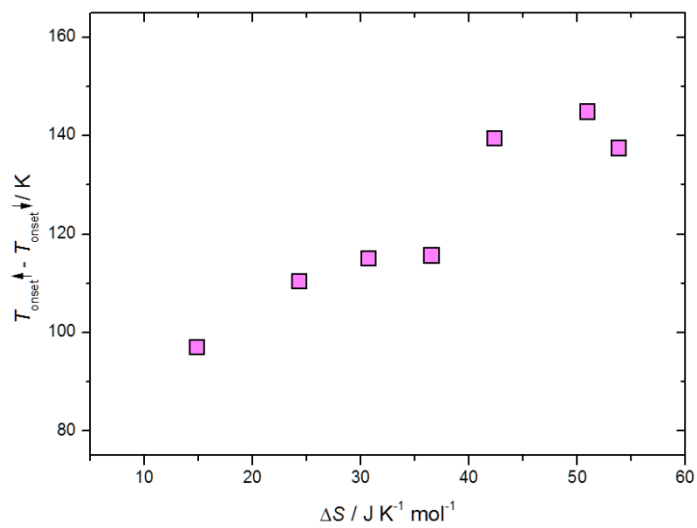

**Fig. S7** Correlation between the hysteresis loop width and the entropy of the  $\mathbf{1}^{\text{A/LS}} \rightarrow \mathbf{1}^{\text{A/HS}}$  transition.

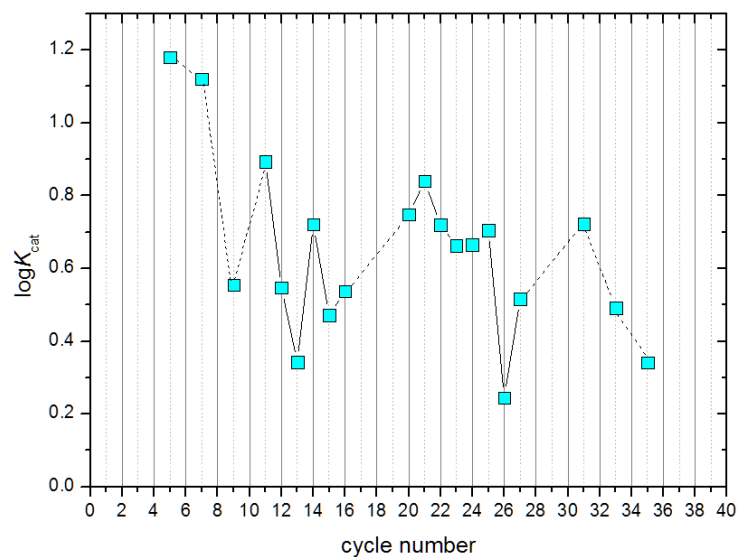

**Fig. S8** Evolution of the  $\log K_{\text{cat}}$  for the  $1^{A/LS} \rightarrow 1^{A/HS}$  transition on multiple cycling (the CnB model).

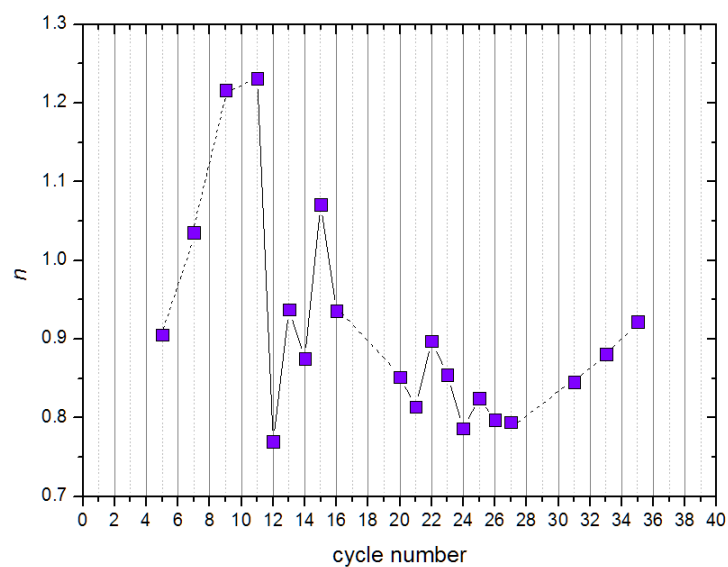

**Fig. S9** Evolution of the reaction order,  $n$ , for the  $1^{A/LS} \rightarrow 1^{A/HS}$  transition on multiple cycling (the CnB model).

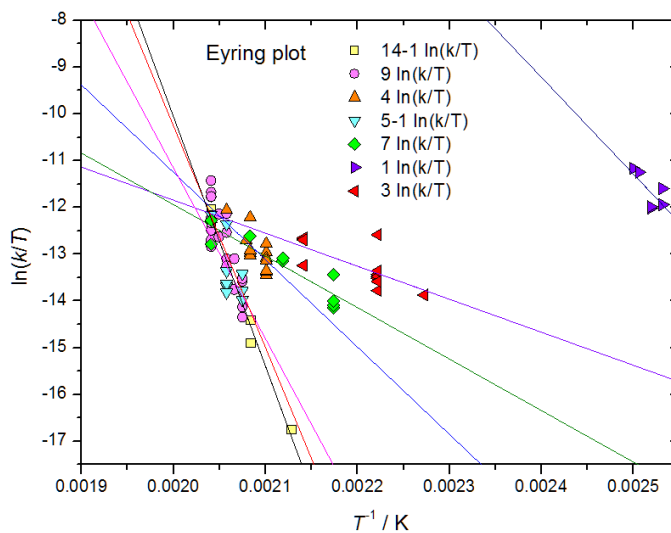

**Fig. S10** The Eyring plot for the samples **14-1, 9, 4, 5-1, 7, 3** and **1**.

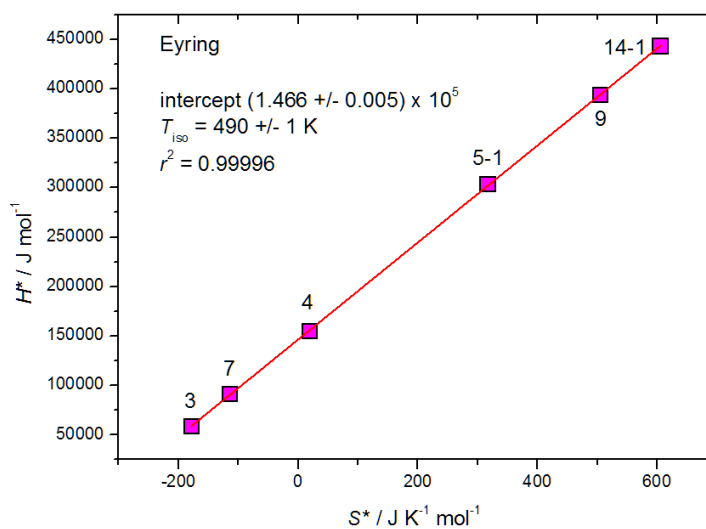

**Fig. S11** The enthalpy-entropy compensation for the  $H^*$  and  $S^*$  values derived from the Eyring plot (see Fig. S10, samples **14-1, 9, 4, 5-1, 7** and **3**).

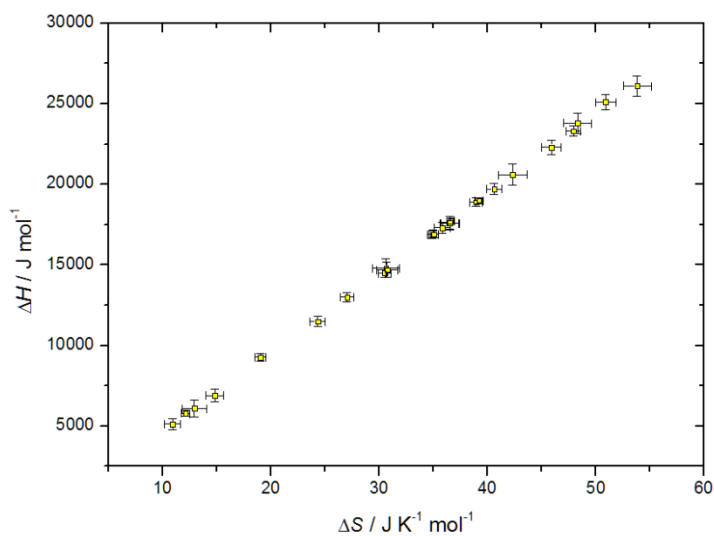

**Fig. S12** The enthalpy-entropy compensation for the  $1^{A/LS} \rightarrow 1^{A/HS}$  spin transition, error bars are shown.

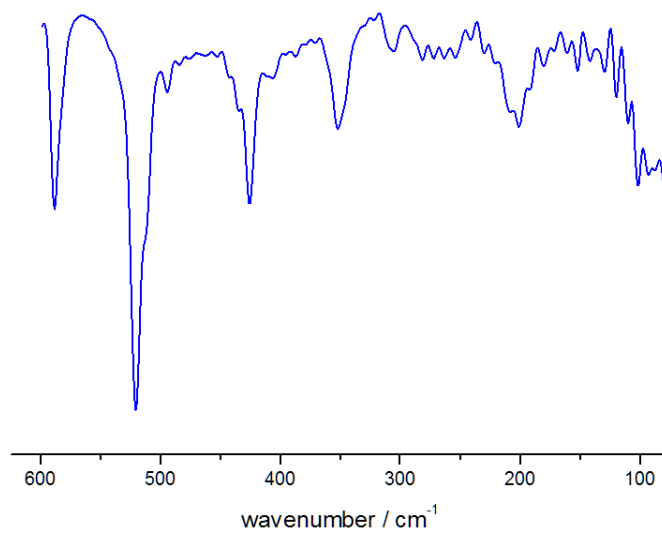

**Fig. S13** Far IR spectrum of the phase **1<sup>A/L5</sup>**.



Cycle 5 / Activation energy

NETZSCH Thermokinetics

Date/Time: 04.02.2016 at 13:37

Project: 1

Model 1: n-th order with autocatalysis by B

A—1→B

Start evaluation: 0.00050 Measurement type: DSC  
 Fine evaluation: 0.99950  
 SCAN 1 Identity: Op 255 17.01.2014 12:57:52/Segm.S1/3  
 Transfer Corr: 204\_F1.kcr  
 Min. Temp/°C: 87.7867 Min. Time/min: 0.0  
 Max. Temp/°C: 227.7923 Max. Time/min: 23.3274  
 Heating rate/(K/min): 6.002 Sampling time/s: 4.999  
 Sample mass/mg: 1.330  
 Base line type: LeftPts: 20 RightPts: 20

PARAMETERS AND STANDARD DEVIATIONS

| # | Parameter              | Initial Val. | Optimum Val. | Minimum | Maximum | Sigrt* | Std.Dev.  |
|---|------------------------|--------------|--------------|---------|---------|--------|-----------|
| 0 | log A1/s <sup>-1</sup> | 153.3196     | 42.8985      |         |         |        | 0.1528    |
| 1 | E1 kJ/mol              | 1456.3173    | 427.1194     |         |         | +      | 1.5151    |
| 2 | React.ord. 1           | 2.7567       | 0.9055       |         |         |        | 6.2426E-2 |
| 3 | log Kcat 1             | 0.4500       | 1.1801       |         |         |        | 2.5865E-2 |
| 4 | Area 1/(J/g)           | 37.0966      | 37.0966      |         |         |        | constant  |

STATISTICS

Least squares: 0.11935 Number of cycles: 9  
 Mean of residues: 2.06094E-2 Max.No of cycles: 50  
 Correlation coefficient: 0.998770 Rel. precision: 0.001000  
 Durbin-Watson Value: 0.084 t-critical(0.95;260): 1.960  
 Durbin-Watson Factor: 3.493

F-TEST ON FIT-QUALITY

| # | Code | Fexp | Fcrit(0.95) | f-ac | Type 1 | Type 2 | Type 3 | Type 4 | Type 5 | Type 6 |
|---|------|------|-------------|------|--------|--------|--------|--------|--------|--------|
| 0 | s:   | 1.00 | 1.23        | 260  | Cn     | B      |        |        |        |        |
| 1 | s:   | 1.16 | 1.23        | 261  | C1     | B      |        |        |        |        |
| 2 | s:   | 1.90 | 1.26        | 176  | Bna    |        |        |        |        |        |
| 3 | s:   | 3.19 | 1.23        | 262  | A3     |        |        |        |        |        |
| 4 | s:   | 3.46 | 1.23        | 262  | A2     |        |        |        |        |        |

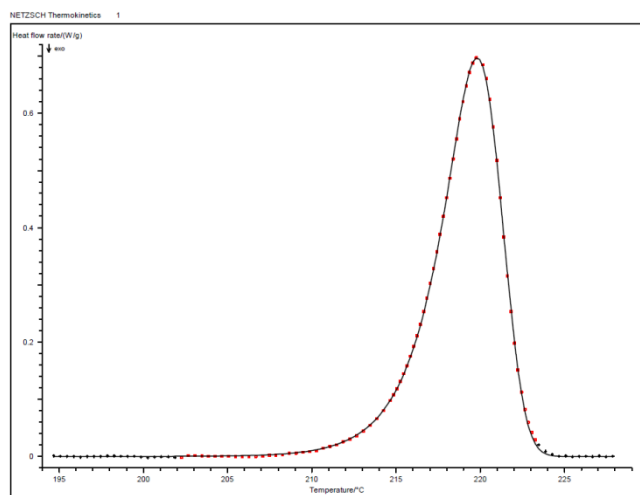

Cycle 7 / Activation energy

NETZSCH Thermokinetics

Date/Time: 04.02.2016 at 16:11

Project: 1

Model 1: n-th order with autocatalysis by B

A → 1 → B

Start evaluation: 0.00050 Measurement type: DSC  
 Fine evaluation: 0.99950  
 SCAN 1 Identity: Op 255 20.01.2014 12:50:45/Segm.S1/3  
 Transfer Corr: 204\_F1.kcr  
 Min. Temp/°C: 188.9538 Min. Time/min: 0.0  
 Max. Temp/°C: 227.7564 Max. Time/min: 6.4660  
 Heating rate/(K/min): 6.001 Sampling time/s: 2.000  
 Sample mass/mg: 1.330  
 Base line type: LeftPts: 6 RightPts: 6

PARAMETERS AND STANDARD DEVIATIONS

| # | Parameter              | Initial Val. | Optimum Val. | Minimum | Maximum | Sigrt* | Std.Dev.  |
|---|------------------------|--------------|--------------|---------|---------|--------|-----------|
| 0 | log A1/s <sup>-1</sup> | 117.1282     | 52.5584      |         |         |        | 7.6833E-3 |
| 1 | E1 kJ/mol              | 1105.2497    | 510.3558     |         |         | +      | 0.1559    |
| 2 | React.ord. 1           | 1.5070       | 1.0359       |         |         |        | 8.2401E-2 |
| 3 | log Kcat 1             | 0.4500       | 1.1204       |         |         |        | 1.0646E-2 |
| 4 | Area 1/(J/g)           | 29.2507      | 29.2507      |         |         |        | constant  |

STATISTICS

Least squares: 0.43749 Number of cycles: 18  
 Mean of residues: 4.73659E-2 Max.No of cycles: 50  
 Correlation coefficient: 0.997672 Rel. precision: 0.001000  
 Durbin-Watson Value: 0.037 t-critical(0.95;156): 1.966  
 Durbin-Watson Factor: 5.254

F-TEST ON FIT-QUALITY

| # | Code | Fexp | Fcrit(0.95) | f-ac | Type 1 | Type 2 | Type 3 | Type 4 | Type 5 | Type 6 |
|---|------|------|-------------|------|--------|--------|--------|--------|--------|--------|
| 0 | s:   | 1.00 | 1.30        | 156  | Cn     | B      |        |        |        |        |
| 1 | s:   | 1.01 | 1.30        | 157  | C1     | B      |        |        |        |        |
| 2 | s:   | 3.13 | 1.30        | 157  | An     |        |        |        |        |        |
| 3 | s:   | 3.45 | 1.30        | 158  | A3     |        |        |        |        |        |
| 4 | s:   | 3.45 | 1.30        | 158  | D1     | F      |        |        |        |        |

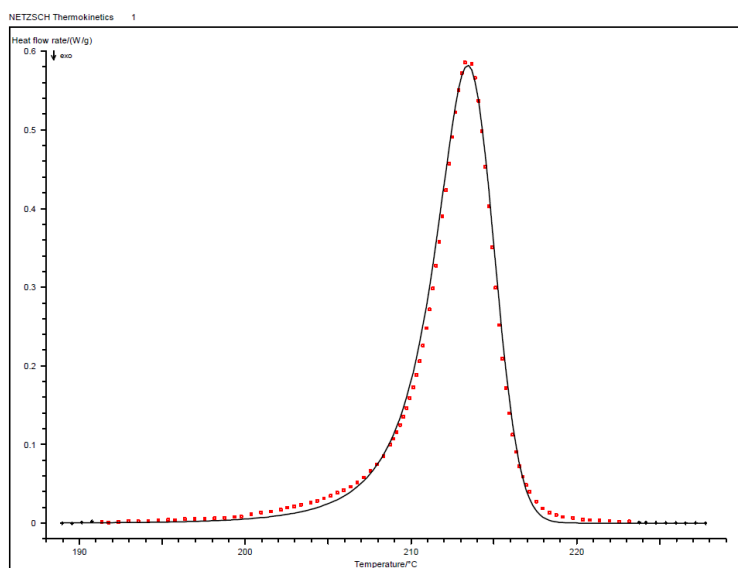

**NETZSCH Thermokinetics**

Date/Time: 03.02.2016 at 11:55

Project: 1

Model 1: n-th order with autocatalysis by B  $A \rightarrow B$

Start evaluation: 0.00050 Measurement type: DSC  
 Fine evaluation: 0.99950  
 SCAN 1 Identity: Op 255 09.07.2015 12:21:12/Segm.S1/1  
 Transfer Corr: 204\_F1.kcr  
 Min. Temp/°C: 172.8490 Min. Time/min: 0.0  
 Max. Temp/°C: 227.6548 Max. Time/min: 9.1313  
 Heating rate/(K/min): 6.002 Sampling time/s: 2.000  
 Sample mass/mg: 1.310  
 Base line type: tangent area prop. LeftPts: 60 RightPts: 10

**PARAMETERS AND STANDARD DEVIATIONS**

| # | Parameter              | Initial Val. | Optimum Val. | Minimum | Maximum | Sigrt* | Std.Dev.  |
|---|------------------------|--------------|--------------|---------|---------|--------|-----------|
| 0 | log A1/s <sup>-1</sup> | 51.6221      | 45.1316      |         |         |        | 4.7623E-3 |
| 1 | E1 kJ/mol              | 490.9298     | 432.2438     |         |         | +      | 0.1080    |
| 2 | React.ord. 1           | 1.3277       | 1.2163       |         |         |        | 3.0724E-2 |
| 3 | log Kcat 1             | 0.4500       | 0.5550       |         |         |        | 5.5587E-3 |
| 4 | Area 1/(J/g)           | 17.0678      | 17.0678      |         |         |        | constant  |

**STATISTICS**

Least squares: 1.51363E-3 Number of cycles: 23  
 Mean of residues: 2.34609E-3 Max.No of cycles: 50  
 Correlation coefficient: 0.999935 Rel. precision: 0.001000  
 Durbin-Watson Value: 0.048 t-critical(0.95;166): 1.965  
 Durbin-Watson Factor: 4.614

**F-TEST ON FIT-QUALITY**

| # | Code | Fexp  | Fcrit(0.95) | f-ac | Type 1 | Type 2 | Type 3 | Type 4 | Type 5 | Type 6 |
|---|------|-------|-------------|------|--------|--------|--------|--------|--------|--------|
| 0 | s:   | 1.00  | 1.29        | 166  | Cn     | B      |        |        |        |        |
| 1 | s:   | 3.55  | 1.29        | 167  | C1     | B      |        |        |        |        |
| 2 | s:   | 25.93 | 1.29        | 167  | Fn     |        |        |        |        |        |
| 3 | s:   | 36.89 | 1.29        | 168  | A3     |        |        |        |        |        |
| 4 | s:   | 37.12 | 1.29        | 167  | An     |        |        |        |        |        |

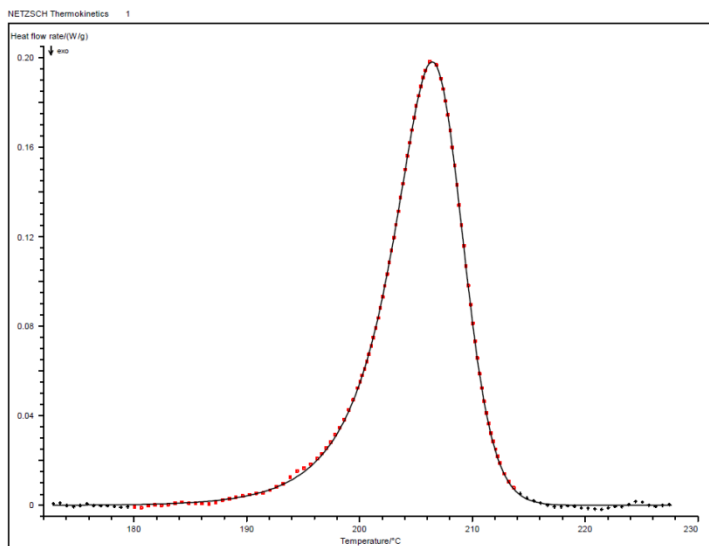

**NETZSCH Thermokinetics** Date/Time: 03.02.2016 at 12:00  
 Project: 1  
 Model 1: n-th order with autocatalysis by B A → B  
 Start evaluation: 0.00050 Measurement type: DSC  
 Fine evaluation: 0.99950  
 SCAN 1 Identity: Op 255 13.07.2015 13:43:30/Segm.S1/1  
 Transfer Corr: 204\_F1.kcr  
 Min. Temp/°C: 168.5396 Min. Time/min: 0.0  
 Max. Temp/°C: 227.5444 Max. Time/min: 9.8324  
 Heating rate/(K/min): 6.001 Sampling time/s: 2.000  
 Sample mass/mg: 1.310  
 Base line type: tangent area prop. LeftPts: 60 RightPts: 20

**PARAMETERS AND STANDARD DEVIATIONS**

| # | Parameter              | Initial Val. | Optimum Val | Minimum | Maximum | Sigrt*Std.Dev. |
|---|------------------------|--------------|-------------|---------|---------|----------------|
| 0 | log A1/s <sup>-1</sup> | 46.6215      | 28.5438     |         |         | 1.3695E-2      |
| 1 | E1 kJ/mol              | 442.6073     | 281.4441    |         |         | + 0.2261       |
| 2 | React.ord. 1           | 1.4984       | 1.2315      |         |         | 2.9955E-2      |
| 3 | log Kcat 1             | 0.4500       | 0.8939      |         |         | 2.4717E-2      |
| 4 | Area 1/(J/g)           | 13.5750      | 13.5750     |         |         | constant       |

**STATISTICS**

Least squares: 1.08352E-2 Number of cycles: 20  
 Mean of residues: 6.05026E-3 Max.No of cycles: 50  
 Correlation coefficient: 0.999007 Rel. precision: 0.001000  
 Durbin-Watson Value: 0.022 t-critical(0.95;225): 1.962  
 Durbin-Watson Factor: 6.830

**F-TEST ON FIT-QUALITY**

| # | Code | Fexp | Fcrit(0.95) | f-act | Type 1 | Type 2 | Type 3 | Type 4 | Type 5 | Type 6 |
|---|------|------|-------------|-------|--------|--------|--------|--------|--------|--------|
| 0 | s:   | 1.00 | 1.25        | 225   | Cn     | B      |        |        |        |        |
| 1 | s:   | 1.69 | 1.25        | 226   | C1     | B      |        |        |        |        |
| 2 | s:   | 5.19 | 1.25        | 226   | Fn     |        |        |        |        |        |
| 3 | s:   | 6.68 | 1.25        | 227   | A2     |        |        |        |        |        |
| 4 | s:   | 6.68 | 1.25        | 227   | F1     |        |        |        |        |        |

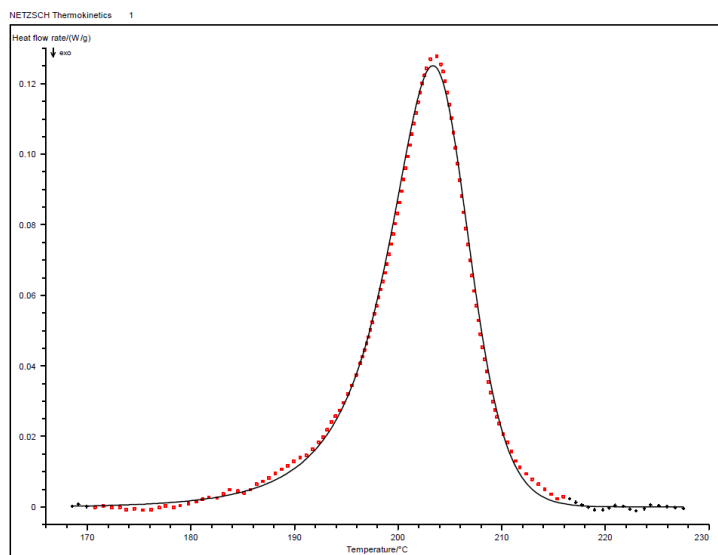

Cycle 12 / Activation energy

NETZSCH Thermokinetics Date/Time: 03.02.2016 at 12:02  
 Project: 1  
 Model 1: n-th order with autocatalysis by B A → B  
 Start evaluation: 0.00050 Measurement type: DSC  
 Fine evaluation: 0.99950  
 SCAN 1 Identity: Op 255 15.07.2015 14:30:24/Segm.S1/1  
 Transfer Corr: 204\_F1.kcr  
 Min. Temp/°C: 186.0045 Min. Time/min: 0.0  
 Max. Temp/°C: 227.6129 Max. Time/min: 6.9313  
 Heating rate/(K/min): 6.003 Sampling time/s: 1.999  
 Sample mass/mg: 1.310  
 Base line type: tangent area prop. LeftPts: 69 RightPts: 6

PARAMETERS AND STANDARD DEVIATIONS

| # | Parameter              | Initial Val. | Optimum Val. | Minimum | Maximum | Sigt* | Std.Dev.  |
|---|------------------------|--------------|--------------|---------|---------|-------|-----------|
| 0 | log A1/s <sup>-1</sup> | 48.0627      | 48.8243      |         |         |       | 9.6161E-2 |
| 1 | E1 kJ/mol              | 471.9764     | 479.4456     |         |         | +     | 0.9026    |
| 2 | React.ord. 1           | 0.7396       | 0.7703       |         |         |       | 4.5366E-2 |
| 3 | log Kcat 1             | 0.4500       | 0.5474       |         |         |       | 2.2765E-2 |
| 4 | Area 1/(J/g)           | 34.4846      | 34.4846      |         |         |       | constant  |

STATISTICS

Least squares: 4.03317E-2 Number of cycles: 23  
 Mean of residues: 1.38915E-2 Max.No of cycles: 50  
 Correlation coefficient: 0.999801 Rel. precision: 0.001000  
 Durbin-Watson Value: 0.169 t-critical(0.95;176): 1.965  
 Durbin-Watson Factor: 2.483

F-TEST ON FIT-QUALITY

| # | Code | Fexp | Fcrit(0.95) | f-act | Type 1 | Type 2 | Type 3 | Type 4 | Type 5 | Type 6 |
|---|------|------|-------------|-------|--------|--------|--------|--------|--------|--------|
| 0 | s:   | 1.00 | 1.28        | 176   | Cn     | B      |        |        |        |        |
| 1 | s:   | 2.95 | 1.28        | 178   | D1     | F      |        |        |        |        |
| 2 | s:   | 3.84 | 1.28        | 178   | D3     | F      |        |        |        |        |
| 3 | s:   | 8.73 | 1.28        | 177   | F      | n      |        |        |        |        |
| 4 | s:   | 9.50 | 1.28        | 178   | R      | 3      |        |        |        |        |

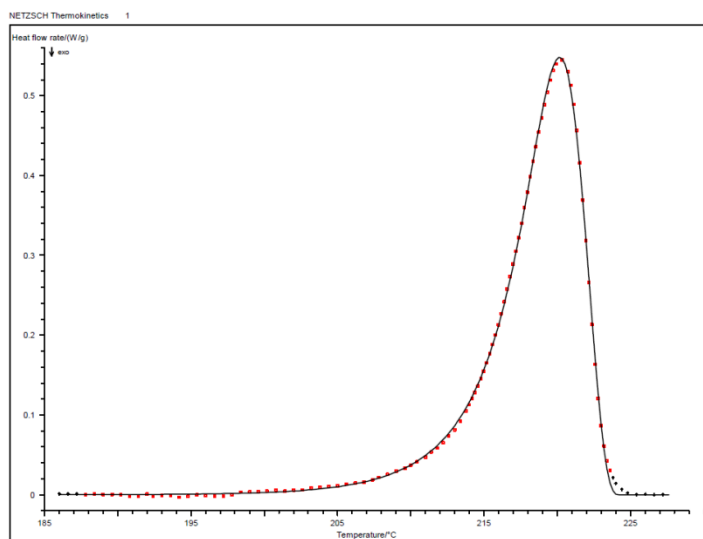

**NETZSCH Thermokinetics**

Date/Time: 03.02.2016 at 12:08

Project: 1  
 Model 1: n-th order with autocatalysis by B  $A \rightarrow B$   
 Start evaluation: 0.00050 Measurement type: DSC  
 Fine evaluation: 0.99950  
 SCAN 1 Identity: Op 255 15.07.2015 15:15:05/Segm.S1/1  
 Transfer Corr: 204\_F1.kcr  
 Min. Temp/°C: 164.1847 Min. Time/min: 0.0  
 Max. Temp/°C: 221.3876 Max. Time/min: 19.0684  
 Heating rate/(K/min): 3.000 Sampling time/s: 4.000  
 Sample mass/mg: 1.310  
 Base line type: tangent area prop. LeftPts: 45 RightPts: 25

**PARAMETERS AND STANDARD DEVIATIONS**

| # | Parameter              | Initial Val. | Optimum Val. | Minimum | Maximum | Sigrt*Std.Dev. |
|---|------------------------|--------------|--------------|---------|---------|----------------|
| 0 | log A1/s <sup>-1</sup> | 33.6667      | 34.7055      |         |         | 3.8540E-2      |
| 1 | E1 kJ/mol              | 324.5504     | 333.2500     |         |         | + 0.6258       |
| 2 | React.ord. 1           | 0.9607       | 0.9379       |         |         | + 0.1936       |
| 3 | log Kcat 1             | 0.4500       | 0.3421       |         |         | 3.5439E-2      |
| 4 | Area 1/(J/g)           | 7.9615       | 7.9615       |         |         | constant       |

**STATISTICS**

Least squares: 1.42699E-3 Number of cycles: 23  
 Mean of residues: 2.22982E-3 Max.No of cycles: 50  
 Correlation coefficient: 0.998643 Rel. precision: 0.001000  
 Durbin-Watson Value: 0.026 t-critical(0.95;195): 1.963  
 Durbin-Watson Factor: 6.249

**F-TEST ON FIT-QUALITY**

| # | Code | Fexp | Fcrit(0.95) | f-act | Type 1 | Type 2 | Type 3 | Type 4 | Type 5 | Type 6 |
|---|------|------|-------------|-------|--------|--------|--------|--------|--------|--------|
| 0 | s:   | 1.00 | 1.27        | 195   | Cn     | B      |        |        |        |        |
| 1 | s:   | 1.12 | 1.27        | 196   | C1     | B      |        |        |        |        |
| 2 | s:   | 2.11 | 1.27        | 196   | Fn     |        |        |        |        |        |
| 3 | s:   | 2.53 | 1.27        | 197   | D1     | F      |        |        |        |        |
| 4 | s:   | 2.71 | 1.27        | 197   | F1     |        |        |        |        |        |

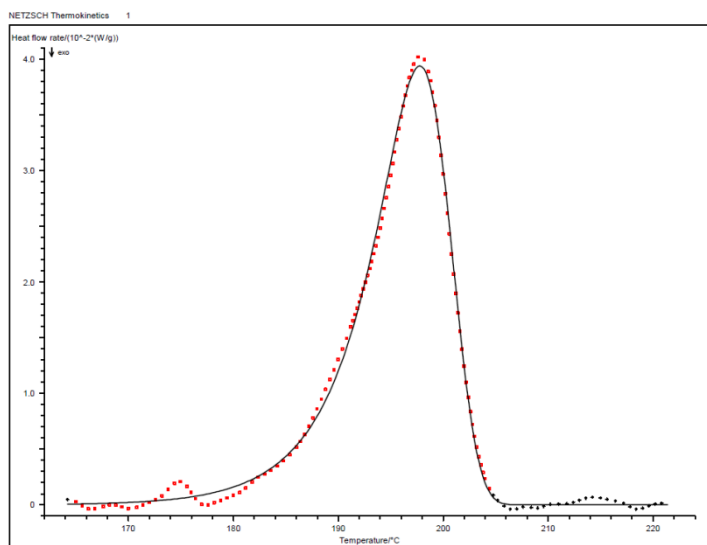

**NETZSCH Thermokinetics** Date/Time: 03.02.2016 at 12:14  
 Project: 1  
 Model 1: n-th order with autocatalysis by B A—1→B  
 Start evaluation: 0.00050 Measurement type: DSC  
 Fine evaluation: 0.99950  
 SCAN 1 Identity: Op 255 16.07.2015 11:58:57/Segm.S1/1  
 Transfer Corr: 204\_F1.kcr  
 Min. Temp/°C: 178.2721 Min. Time/min: 0.0  
 Max. Temp/°C: 227.4767 Max. Time/min: 8.1988  
 Heating rate/(K/min): 6.001 Sampling time/s: 2.000  
 Sample mass/mg: 1.310  
 Base line type: tangent area prop. LeftPts: 60 RightPts: 20

**PARAMETERS AND STANDARD DEVIATIONS**

| # | Parameter              | Initial Val. | Optimum Val. | Minimum | Maximum | Sigrt* | Std.Dev.  |
|---|------------------------|--------------|--------------|---------|---------|--------|-----------|
| 0 | log A1/s <sup>-1</sup> | 41.8559      | 31.4675      |         |         |        | 1.2385E-2 |
| 1 | E1 kJ/mol              | 409.6643     | 314.8270     |         |         | +      | 0.2317    |
| 2 | React.ord. 1           | 1.0311       | 0.8754       |         |         |        | 8.2860E-2 |
| 3 | log Kcat 1             | 0.4500       | 0.7214       |         |         |        | 1.2664E-2 |
| 4 | Area 1/(J/g)           | 33.1670      | 33.1670      |         |         |        | constant  |

**STATISTICS**

|                          |            |                       |          |
|--------------------------|------------|-----------------------|----------|
| Least squares:           | 4.26554E-2 | Number of cycles:     | 20       |
| Mean of residues:        | 1.31413E-2 | Max.No of cycles:     | 50       |
| Correlation coefficient: | 0.999470   | Rel. precision:       | 0.001000 |
| Durbin-Watson Value:     | 0.066      | t-critical(0.95;142): | 1.968    |
| Durbin-Watson Factor:    | 3.915      |                       |          |

**F-TEST ON FIT-QUALITY**

| # | Code | Fexp | Fcrit(0.95) | f-ac | Type 1 | Type 2 | Type 3 | Type 4 | Type 5 | Type 6 |
|---|------|------|-------------|------|--------|--------|--------|--------|--------|--------|
| 0 | s:   | 1.00 | 1.32        | 142  | Cn     | B      |        |        |        |        |
| 1 | s:   | 1.95 | 1.32        | 143  | C1     | B      |        |        |        |        |
| 2 | s:   | 4.07 | 1.32        | 143  | Fn     |        |        |        |        |        |
| 3 | s:   | 4.10 | 1.32        | 142  | Bna    |        |        |        |        |        |
| 4 | s:   | 6.10 | 1.32        | 144  | A3     |        |        |        |        |        |

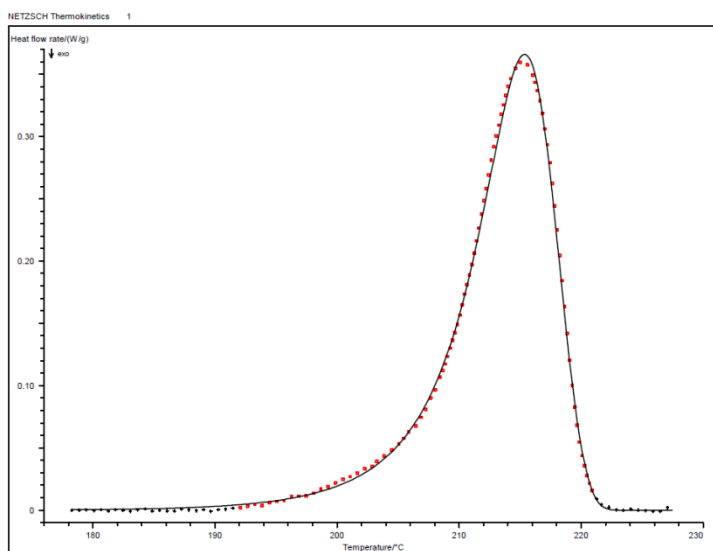

**NETZSCH Thermokinetics**

Date/Time: 03.02.2016 at 12:52

Project: 1

Model 1: n-th order with autocatalysis by B

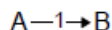

Start evaluation: 0.00050 Measurement type: DSC  
 Fine evaluation: 0.99950  
 SCAN 1 Identity: Op 255 16.07.2015 15:15:29/Segm.S1/1  
 Transfer Corr: 204\_F1.kcr  
 Min. Temp/°C: 176.5422 Min. Time/min: 0.0  
 Max. Temp/°C: 227.3505 Max. Time/min: 4.2318  
 Heating rate/(K/min): 12.006 Sampling time/s: 1.000  
 Sample mass/mg: 1.310  
 Base line type: tangent area prop. LeftPts: 50 RightPts: 15

**PARAMETERS AND STANDARD DEVIATIONS**

| # | Parameter              | Initial Val. | Optimum Val. | Minimum | Maximum | Sigrt* | Std.Dev.  |
|---|------------------------|--------------|--------------|---------|---------|--------|-----------|
| 0 | log A1/s <sup>-1</sup> | 36.8853      | 35.5669      |         |         |        | 1.2441E-2 |
| 1 | E1 kJ/mol              | 358.7495     | 346.5764     |         |         | +      | 0.2377    |
| 2 | React.ord. 1           | 1.0932       | 1.0715       |         |         |        | 6.2497E-2 |
| 3 | log Kcat 1             | 0.4500       | 0.4721       |         |         |        | 9.0147E-3 |
| 4 | Area 1/(J/g)           | 16.5223      | 16.5223      |         |         |        | constant  |

**STATISTICS**

Least squares: 1.54803E-2 Number of cycles: 23  
 Mean of residues: 7.79148E-3 Max.No of cycles: 50  
 Correlation coefficient: 0.999794 Rel. precision: 0.001000  
 Durbin-Watson Value: 0.030 t-critical(0.95;192): 1.963  
 Durbin-Watson Factor: 5.841

**F-TEST ON FIT-QUALITY**

| # | Code | Fexp | Fcrit(0.95) | f-act | Type 1 | Type 2 | Type 3 | Type 4 | Type 5 | Type 6 |
|---|------|------|-------------|-------|--------|--------|--------|--------|--------|--------|
| 0 | s:   | 1.00 | 1.27        | 192   | Cn     | B      |        |        |        |        |
| 1 | s:   | 1.75 | 1.27        | 193   | C1     | B      |        |        |        |        |
| 2 | s:   | 9.26 | 1.27        | 194   | A3     |        |        |        |        |        |
| 3 | s:   | 9.31 | 1.27        | 194   | A2     |        |        |        |        |        |
| 4 | s:   | 9.35 | 1.27        | 193   | An     |        |        |        |        |        |

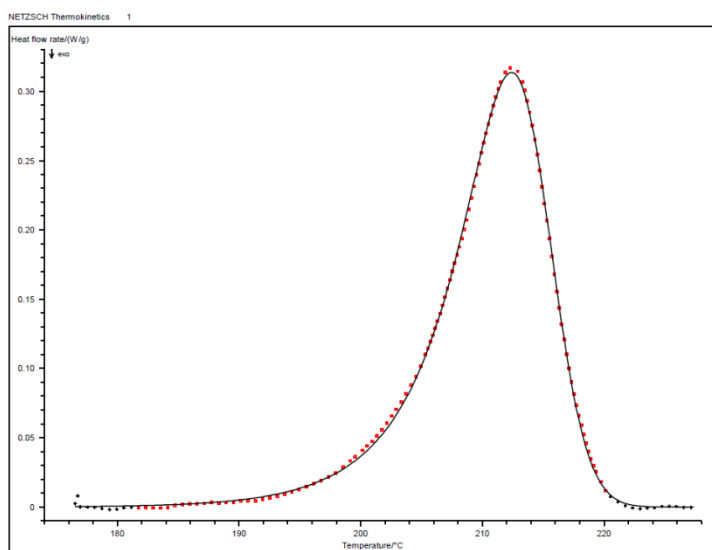



**NETZSCH Thermokinetics**

Date/Time: 03.02.2016 at 13:09

Project: 1  
 Model 1: n-th order with autocatalysis by B  $A \rightarrow B$   
 Start evaluation: 0.00050 Measurement type: DSC  
 Fine evaluation: 0.99950  
 SCAN 1 Identity: Op 255 16.07.2016 18:08:14/Segm.S1/1  
 Transfer Corr: 204\_F1.kcr  
 Min. Temp/°C: 174.1281 Min. Time/min: 0.0  
 Max. Temp/°C: 227.5372 Max. Time/min: 8.8979  
 Heating rate/(K/min): 6.002 Sampling time/s: 2.000  
 Sample mass/mg: 1.310  
 Base line type: tangent area prop. LeftPts: 70 RightPts: 10

**PARAMETERS AND STANDARD DEVIATIONS**

| # | Parameter              | Initial Val. | Optimum Val. | Minimum | Maximum | Sigrt*Std.Dev. |
|---|------------------------|--------------|--------------|---------|---------|----------------|
| 0 | log A1/s <sup>-1</sup> | 43.0763      | 37.0889      |         |         | 8.7432E-3      |
| 1 | E1 kJ/mol              | 420.2877     | 365.2751     |         |         | + 0.1681       |
| 2 | React.ord. 1           | 1.0536       | 0.9362       |         |         | 5.5884E-2      |
| 3 | log Kcat 1             | 0.4500       | 0.5375       |         |         | 7.8228E-3      |
| 4 | Area 1/(J/g)           | 30.9043      | 30.9043      |         |         | constant       |

**STATISTICS**

Least squares: 1.38443E-2 Number of cycles: 23  
 Mean of residues: 7.18734E-3 Max.No of cycles: 50  
 Correlation coefficient: 0.999839 Rel. precision: 0.001000  
 Durbin-Watson Value: 0.046 t-critical(0.95;224): 1.962  
 Durbin-Watson Factor: 4.714

**F-TEST ON FIT-QUALITY**

| # | Code | Fexp | Fcrit(0.95) | f-ac | Type 1 | Type 2 | Type 3 | Type 4 | Type 5 | Type 6 |
|---|------|------|-------------|------|--------|--------|--------|--------|--------|--------|
| 0 | s:   | 1.00 | 1.25        | 224  | Cn     | B      |        |        |        |        |
| 1 | s:   | 1.80 | 1.25        | 225  | C1     | B      |        |        |        |        |
| 2 | s:   | 7.36 | 1.25        | 225  | An     |        |        |        |        |        |
| 3 | s:   | 9.45 | 1.25        | 225  | Fn     |        |        |        |        |        |
| 4 | s:   | 9.49 | 1.25        | 224  | Bna    |        |        |        |        |        |

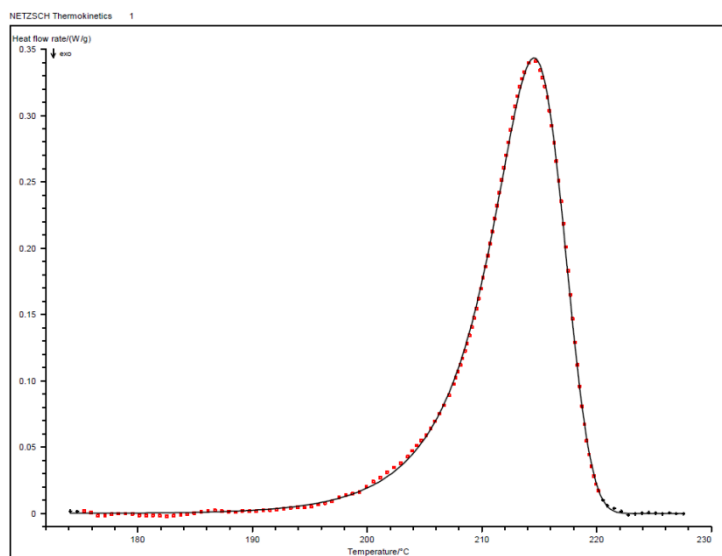

Cycle 20 / Activation energy

NETZSCH Thermokinetics

Date/Time: 03.02.2016 at 13:59

Project: 1

Model 1: n-th order with autocatalysis by B A-1->B

Start evaluation: 0.00050 Measurement type: DSC  
 Fine evaluation: 0.99950  
 SCAN 1 Identity: Op 255 29.07.2015 10:43:36/Segm.S1/1  
 Transfer Corr: 204\_F1.kcr  
 Min. Temp/°C: 179.7794 Min. Time/min: 0.0  
 Max. Temp°C: 227.3863 Max. Time/min: 5.2867  
 Heating rate/(K/min): 9.005 Sampling time/s: 1.333  
 Sample mass/mg: 1.310  
 Base line type: tangent area prop. LeftPts: 60 RightPts: 20

PARAMETERS AND STANDARD DEVIATIONS

| # | Parameter    | Initial Val. | Optimum Val. | Minimum | Maximum | Sigr*Std.Dev. |
|---|--------------|--------------|--------------|---------|---------|---------------|
| 0 | log A1/s^-1  | 47.1125      | 36.9533      |         |         | 5.4709E-3     |
| 1 | E1 kJ/mol    | 455.0106     | 362.4580     |         |         | + 0.1080      |
| 2 | React.ord. 1 | 0.8957       | 0.8519       |         |         | 4.1742E-2     |
| 3 | log Kcat 1   | 0.4500       | 0.7480       |         |         | 8.3408E-3     |
| 4 | Area 1/(J/g) | 24.4576      | 24.4576      |         |         | constant      |

STATISTICS

Least squares: 4.30614E-2 Number of cycles: 19  
 Mean of residues: 1.34228E-2 Max.No of cycles: 50  
 Correlation coefficient: 0.999648 Rel. precision: 0.001000  
 Durbin-Watson Value: 0.060 t-critical(0.95;123): 1.970  
 Durbin-Watson Factor: 4.125

F-TEST ON FIT-QUALITY

| # | Code | Fexp  | Fcrit(0.95) | f-ac | Type 1 | Type 2 | Type 3 | Type 4 | Type 5 | Type 6 |
|---|------|-------|-------------|------|--------|--------|--------|--------|--------|--------|
| 0 | s:   | 1.00  | 1.35        | 123  | Cn     | B      |        |        |        |        |
| 1 | s:   | 3.61  | 1.35        | 124  | C1     | B      |        |        |        |        |
| 2 | s:   | 3.98  | 1.35        | 125  | D1     | F      |        |        |        |        |
| 3 | s:   | 9.57  | 1.35        | 125  | D3     | F      |        |        |        |        |
| 4 | s:   | 10.81 | 1.35        | 124  | Fn     |        |        |        |        |        |

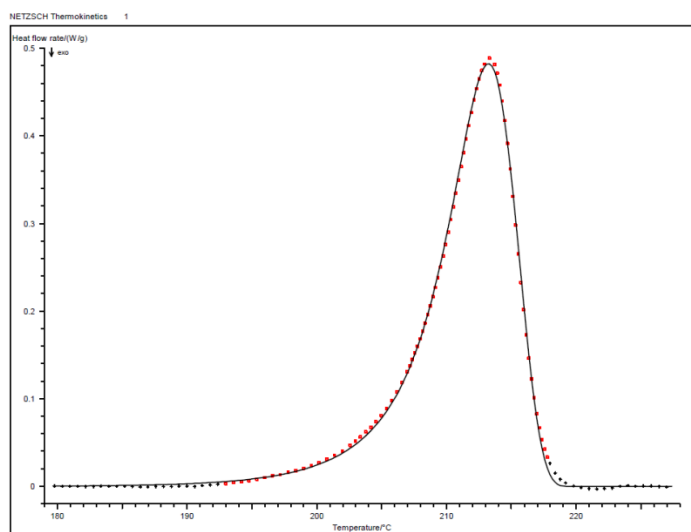

**NETZSCH Thermokinetics**

Date/Time: 03.02.2016 at 14:21

Project: 1  
 Model 1: n-th order with autocatalysis by B

A—1→B

Start evaluation: 0.00050 Measurement type: DSC  
 Fine evaluation: 0.99950  
 SCAN 1 Identity: Op 255 30.07.2015 11:30:45/Segm.S1/1  
 Transfer Corr: 204\_F1.kcr  
 Min. Temp/°C: 169.9010 Min. Time/min: 0.0  
 Max. Temp/°C: 227.5113 Max. Time/min: 6.3981  
 Heating rate/(K/min): 9.004 Sampling time/s: 1.333  
 Sample mass/mg: 1.310  
 Base line type: tangent area prop. LeftPts: 50 RightPts: 8

**PARAMETERS AND STANDARD DEVIATIONS**

| # | Parameter              | Initial Val. | Optimum Val. | Minimum | Maximum | Sigrt* | Std.Dev.  |
|---|------------------------|--------------|--------------|---------|---------|--------|-----------|
| 0 | log A1/s <sup>-1</sup> | 27.6988      | 27.6989      |         |         |        | 0.4440    |
| 1 | E1 kJ/mol              | 276.6311     | 276.6312     |         |         | +      | 4.0711    |
| 2 | React.ord. 1           | 0.8147       | 0.8140       |         |         | +      | 0.1716    |
| 3 | log Kcat 1             | 0.8404       | 0.8400       |         |         |        | 5.8158E-2 |
| 4 | Area 1/(J/g)           | 24.5259      | 24.5259      |         |         |        | constant  |

**STATISTICS**

Least squares: 0.22679 Number of cycles: 11  
 Mean of residues: 2.80131E-2 Max.No of cycles: 50  
 Correlation coefficient: 0.997915 Rel. precision: 0.001000  
 Durbin-Watson Value: 0.031 t-critical(0.95;238): 1.961  
 Durbin-Watson Factor: 5.708

**F-TEST ON FIT-QUALITY**

| # | Code | Fexp | Fcrit(0.95) | f-ac | Type 1 | Type 2 | Type 3 | Type 4 | Type 5 | Type 6 |
|---|------|------|-------------|------|--------|--------|--------|--------|--------|--------|
| 0 | s:   | 1.00 | 1.24        | 238  | Cn     | B      |        |        |        |        |
| 1 | s:   | 1.63 | 1.24        | 239  | C1     | B      |        |        |        |        |
| 2 | s:   | 2.32 | 1.24        | 240  | D3     | F      |        |        |        |        |
| 3 | s:   | 3.07 | 1.24        | 239  | An     |        |        |        |        |        |
| 4 | s:   | 3.38 | 1.24        | 239  | Fn     |        |        |        |        |        |

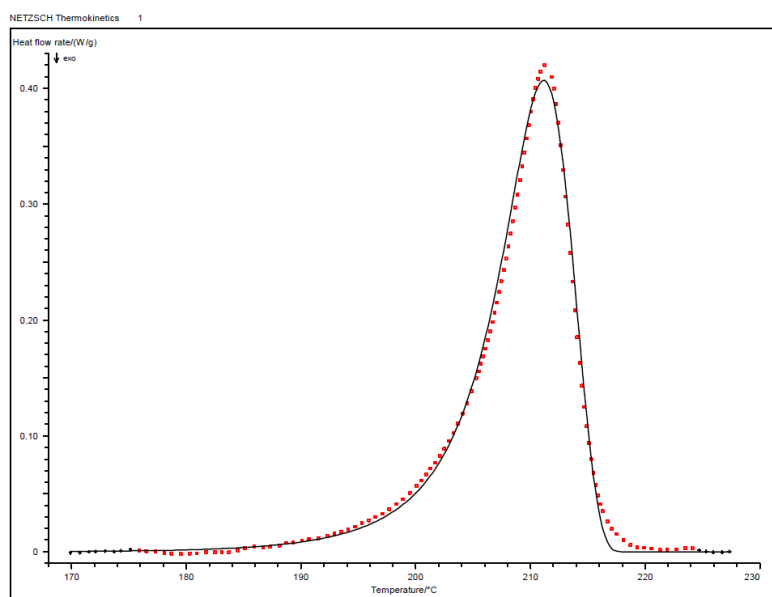

**NETZSCH Thermokinetics**

Date/Time: 03.02.2016 at 14:24

Project: 1

Model 1: n-th order with autocatalysis by B

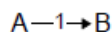

Start evaluation: 0.00050 Measurement type: DSC  
 Fine evaluation: 0.99950  
 SCAN 1 Identity: Op 255 31.07.2015 13:08:35/Segm.S1/1  
 Transfer Corr: 204\_F1.kcr  
 Min. Temp/°C: 176.2536 Min. Time/min: 0.0  
 Max. Temp/°C: 227.4630 Max. Time/min: 5.6880  
 Heating rate/(K/min): 9.003 Sampling time/s: 1.333  
 Sample mass/mg: 1.310  
 Base line type: tangent area prop. LeftPts: 50 RightPts: 7

**PARAMETERS AND STANDARD DEVIATIONS**

| # | Parameter              | Initial Val. | Optimum Val. | Minimum | Maximum | Sigrt* | Std.Dev.  |
|---|------------------------|--------------|--------------|---------|---------|--------|-----------|
| 0 | log A1/s <sup>-1</sup> | 43.8516      | 34.3684      |         |         |        | 1.1414E-2 |
| 1 | E1 kJ/mol              | 425.0963     | 338.6499     |         |         | +      | 0.2221    |
| 2 | React.ord. 1           | 0.9541       | 0.8978       |         |         |        | 8.1385E-2 |
| 3 | log Kcat 1             | 0.4500       | 0.7197       |         |         |        | 1.1747E-2 |
| 4 | Area 1/(J/g)           | 22.8175      | 22.8175      |         |         |        | constant  |

**STATISTICS**

Least squares: 4.15463E-2 Number of cycles: 19  
 Mean of residues: 1.27145E-2 Max.No of cycles: 50  
 Correlation coefficient: 0.999494 Rel. precision: 0.001000  
 Durbin-Watson Value: 0.032 t-critical(0.95;126): 1.970  
 Durbin-Watson Factor: 5.616

**F-TEST ON FIT-QUALITY**

| # | Code | Fexp | Fcrit(0.95) | f-ac | Type 1 | Type 2 | Type 3 | Type 4 | Type 5 | Type 6 |
|---|------|------|-------------|------|--------|--------|--------|--------|--------|--------|
| 0 | s:   | 1.00 | 1.34        | 126  | Cn     | B      |        |        |        |        |
| 1 | s:   | 1.89 | 1.34        | 127  | C1     | B      |        |        |        |        |
| 2 | s:   | 4.95 | 1.34        | 128  | D1     | F      |        |        |        |        |
| 3 | s:   | 7.02 | 1.34        | 127  | An     |        |        |        |        |        |
| 4 | s:   | 8.20 | 1.34        | 127  | Fn     |        |        |        |        |        |

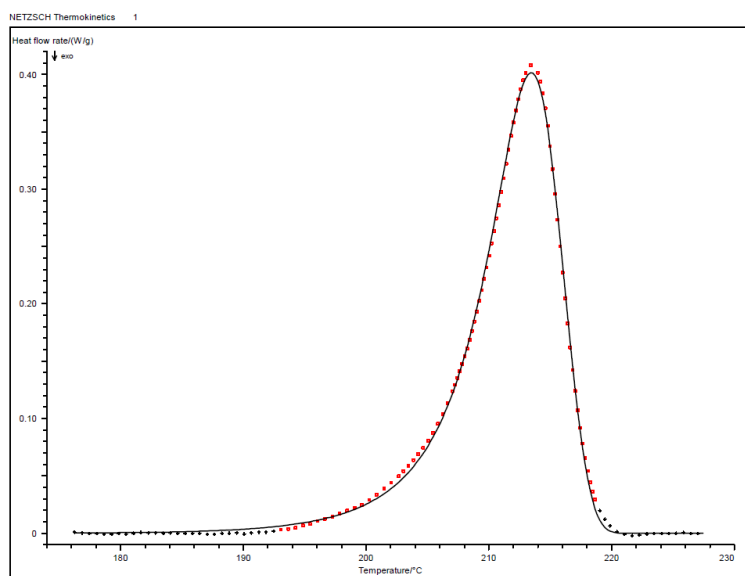

**NETZSCH Thermokinetics**

Date/Time: 03.02.2016 at 14:26

Project: 1

Model 1: n-th order with autocatalysis by B

A → 1 → B

|                       |                    |                   |                               |
|-----------------------|--------------------|-------------------|-------------------------------|
| Start evaluation:     | 0.00050            | Measurement type: | DSC                           |
| Fine evaluation:      | 0.99950            |                   |                               |
| SCAN 1 Identity:      | 204_F1.kcr         | Op 255            | 03.08.2015 14:55:33/Segm.S1/1 |
| Transfer Corr:        | 204_F1.kcr         |                   |                               |
| Min. Temp/°C:         | 179.6356           | Min. Time/min:    | 0.0                           |
| Max. Temp/°C:         | 227.4468           | Max. Time/min:    | 5.3100                        |
| Heating rate/(K/min): | 9.004              | Sampling time/s:  | 1.333                         |
| Sample mass/mg:       | 1.310              |                   |                               |
| Base line type:       | tangent area prop. | LeftPts: 50       | RightPts: 7                   |

**PARAMETERS AND STANDARD DEVIATIONS**

| # | Parameter              | Initial Val. | Optimum Val. | Minimum | Maximum | Sigrt* | Std.Dev.  |
|---|------------------------|--------------|--------------|---------|---------|--------|-----------|
| 0 | log A1/s <sup>-1</sup> | 42.8485      | 35.9709      |         |         |        | 6.1102E-3 |
| 1 | E1 kJ/mol              | 416.4318     | 353.6080     |         |         |        | 8.0819E-2 |
| 2 | React.ord. 1           | 0.8792       | 0.8550       |         |         |        | 3.6694E-2 |
| 3 | log Kcat 1             | 0.4500       | 0.6628       |         |         |        | 1.2388E-2 |
| 4 | Area 1/(J/g)           | 24.2074      | 24.2074      |         |         |        | constant  |

**STATISTICS**

|                          |            |                       |          |
|--------------------------|------------|-----------------------|----------|
| Least squares:           | 9.23205E-2 | Number of cycles:     | 19       |
| Mean of residues:        | 1.96130E-2 | Max.No of cycles:     | 50       |
| Correlation coefficient: | 0.999264   | Rel. precision:       | 0.001000 |
| Durbin-Watson Value:     | 0.038      | t-critical(0.95;160): | 1.966    |
| Durbin-Watson Factor:    | 5.169      |                       |          |

**F-TEST ON FIT-QUALITY**

| # | Code | Fexp | Fcrit(0.95) | f-act | Type 1 | Type 2 | Type 3 | Type 4 | Type 5 | Type 6 |
|---|------|------|-------------|-------|--------|--------|--------|--------|--------|--------|
| 0 | s:   | 1.00 | 1.30        | 160   | Cn     | B      |        |        |        |        |
| 1 | s:   | 1.54 | 1.30        | 162   | D1     | F      |        |        |        |        |
| 2 | s:   | 2.26 | 1.30        | 161   | C1     | B      |        |        |        |        |
| 3 | s:   | 3.94 | 1.30        | 162   | D3     | F      |        |        |        |        |
| 4 | s:   | 5.30 | 1.30        | 161   | Fn     |        |        |        |        |        |

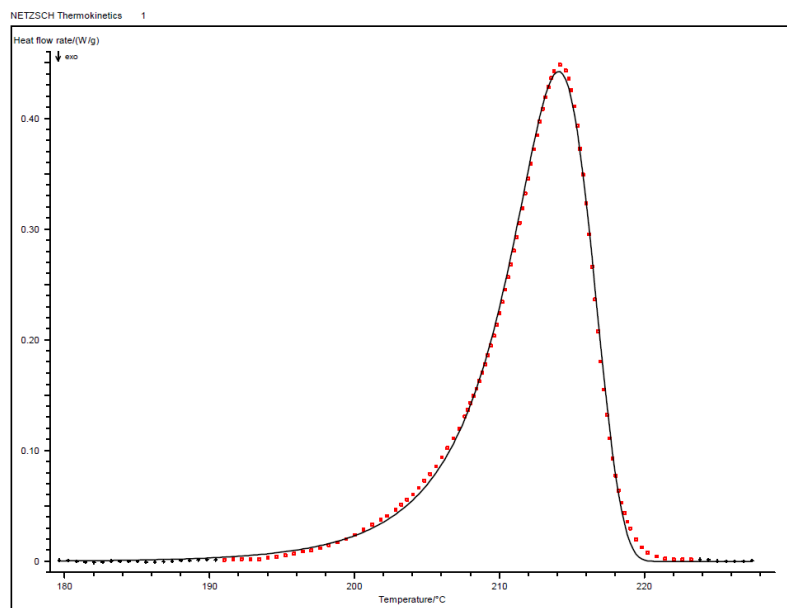

**NETZSCH Thermokinetics**

Date/Time: 03.02.2016 at 15:19

Project: 1

Model 1: n-th order with autocatalysis by B  $A \rightarrow 1 \rightarrow B$

Start evaluation: 0.00050 Measurement type: DSC  
 Fine evaluation: 0.99950  
 SCAN 1 Identity: Op 255 04.08.2015 11:55:00/Segm.S1/1  
 Transfer Corr: 204\_F1.kcr  
 Min. Temp°C: 165.7738 Min. Time/min: 0.0  
 Max. Temp°C: 227.1731 Max. Time/min: 5.1130  
 Heating rate/(K/min): 12.008 Sampling time/s: 0.999  
 Sample mass/mg: 1.310  
 Base line type: tangent area prop. LeftPts: 100 RightPts: 1

**PARAMETERS AND STANDARD DEVIATIONS**

| # | Parameter              | Initial Val. | Optimum Val. | Minimum | Maximum | Sigrt* | Std.Dev.  |
|---|------------------------|--------------|--------------|---------|---------|--------|-----------|
| 0 | log A1/s <sup>-1</sup> | 30.3269      | 25.5707      |         |         |        | 0.3025    |
| 1 | E1 kJ/mol              | 299.0150     | 255.9739     |         |         | +      | 2.7158    |
| 2 | React.ord. 1           | 0.7698       | 0.7866       |         |         |        | 7.0665E-2 |
| 3 | log Kcat 1             | 0.4500       | 0.6643       |         |         |        | 4.4024E-2 |
| 4 | Area 1/(J/g)           | 21.4900      | 21.4900      |         |         |        | constant  |

**STATISTICS**

Least squares: 0.13566 Number of cycles: 16  
 Mean of residues: 2.09870E-2 Max.No of cycles: 50  
 Correlation coefficient: 0.998840 Rel. precision: 0.001000  
 Durbin-Watson Value: 0.023 t-critical(0.95;252): 1.961  
 Durbin-Watson Factor: 6.650

**F-TEST ON FIT-QUALITY**

| # | Code | Fexp | Fcrit(0.95) | f-act | Type 1 | Type 2 | Type 3 | Type 4 | Type 5 | Type 6 |
|---|------|------|-------------|-------|--------|--------|--------|--------|--------|--------|
| 0 | s:   | 1.00 | 1.23        | 252   | Cn     | B      |        |        |        |        |
| 1 | s:   | 2.17 | 1.23        | 254   | D3     | F      |        |        |        |        |
| 2 | s:   | 2.87 | 1.23        | 253   | C1     | B      |        |        |        |        |
| 3 | s:   | 3.96 | 1.23        | 253   | Fn     |        |        |        |        |        |
| 4 | s:   | 4.15 | 1.23        | 254   | R3     |        |        |        |        |        |

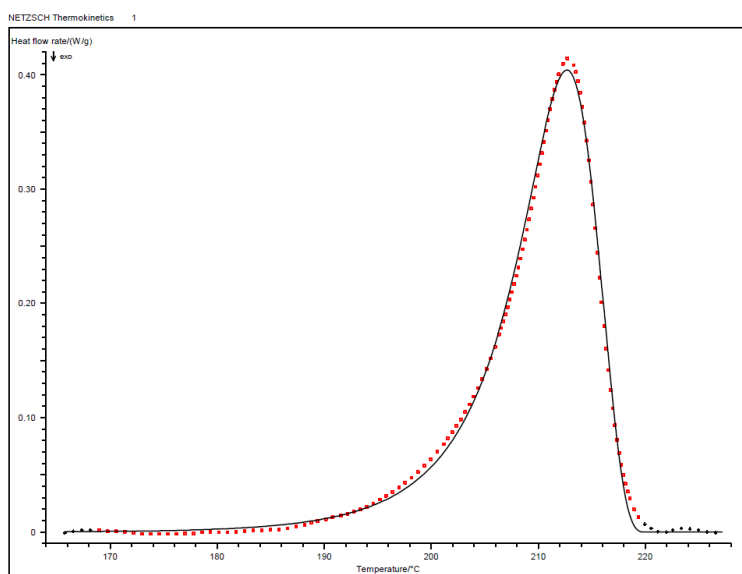

**NETZSCH Thermokinetics**

Date/Time: 03.02.2016 at 15:15

Project: 1

Model 1: n-th order with autocatalysis by B

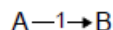

Start evaluation: 0.00050 Measurement type: DSC  
 Fine evaluation: 0.99950  
 SCAN 1 Identity: Op 255 05.08.2015 11:57:37/Segm.S1/1  
 Transfer Corr: 204\_F1.kcr  
 Min. Temp/°C: 165.8194 Min. Time/min: 0.0  
 Max. Temp/°C: 227.0363 Max. Time/min: 5.0974  
 Heating rate/(K/min): 12.009 Sampling time/s: 0.999  
 Sample mass/mg: 1.310  
 Base line type: tangent area prop. LeftPts: 102 RightPts: 8

**PARAMETERS AND STANDARD DEVIATIONS**

| # | Parameter    | Initial Val. | Optimum Val. | Minimum | Maximum | Sigr*Std.Dev. |
|---|--------------|--------------|--------------|---------|---------|---------------|
| 0 | log A1/s^-1  | 26.0358      | 26.0358      |         |         | 7.9116E-3     |
| 1 | E1 kJ/mol    | 260.6830     | 260.6830     |         |         | 9.6994E-2     |
| 2 | React.ord. 1 | 0.8251       | 0.8251       |         |         | 4.0280E-2     |
| 3 | log Kcat 1   | 0.7050       | 0.7050       |         |         | 1.3091E-2     |
| 4 | Area 1/(J/g) | 21.3817      | 21.3817      |         |         | constant      |

**STATISTICS**

Least squares: 8.85862E-2 Number of cycles: 14  
 Mean of residues: 1.69869E-2 Max.No of cycles: 50  
 Correlation coefficient: 0.999268 Rel. precision: 0.001000  
 Durbin-Watson Value: 0.025 t-critical(0.95;267): 1.960  
 Durbin-Watson Factor: 6.340

**F-TEST ON FIT-QUALITY**

| # | Code | Fexp | Fcrit(0.95) | f-act | Type 1 | Type 2 | Type 3 | Type 4 | Type 5 | Type 6 |
|---|------|------|-------------|-------|--------|--------|--------|--------|--------|--------|
| 0 | s:   | 1.00 | 1.22        | 267   | Cn     | B      |        |        |        |        |
| 1 | s:   | 2.70 | 1.22        | 268   | C1     | B      |        |        |        |        |
| 2 | s:   | 3.35 | 1.22        | 269   | D3     | F      |        |        |        |        |
| 3 | s:   | 5.29 | 1.22        | 268   | Fn     |        |        |        |        |        |
| 4 | s:   | 6.14 | 1.22        | 269   | R3     |        |        |        |        |        |

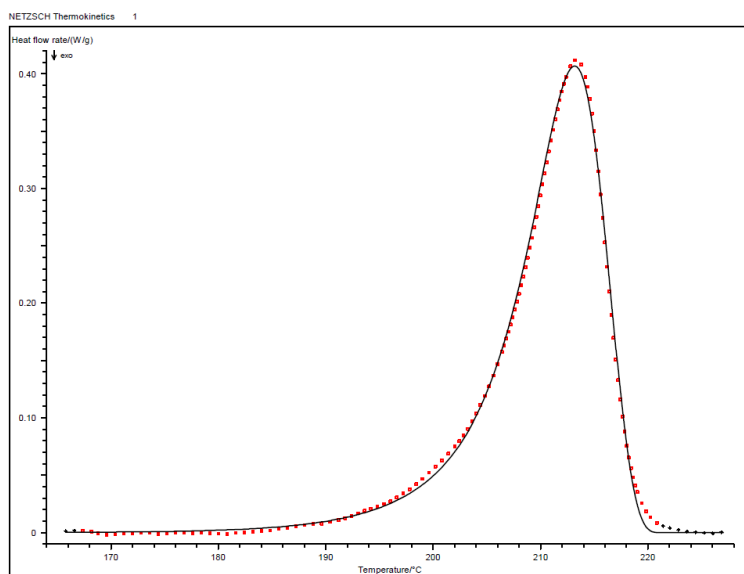

NETZSCH Thermokinetics

Date/Time: 03.02.2016 at 14:55

Project: 1

Model 1: n-th order with autocatalysis by B  $A \rightarrow B$

Start evaluation: 0.00050 Measurement type: DSC  
 Fine evaluation: 0.99950  
 SCAN 1 Identity: Op 255 06.08.2015 12:11:54/Segm.S1/1  
 Transfer Corr: 204\_F1.kcr  
 Min. Temp/°C: 169.9803 Min. Time/min: 0.0  
 Max. Temp/°C: 227.3754 Max. Time/min: 4.7818  
 Heating rate/(K/min): 12.003 Sampling time/s: 1.000  
 Sample mass/mg: 1.310  
 Base line type: tangent area prop. LeftPts: 7 RightPts: 8

PARAMETERS AND STANDARD DEVIATIONS

| # | Parameter              | Initial Val. | Optimum Val. | Minimum | Maximum | Sigr* | Std.Dev.  |
|---|------------------------|--------------|--------------|---------|---------|-------|-----------|
| 0 | log A1/s <sup>-1</sup> | 24.3838      | 33.7261      |         |         |       | 8.0300E-3 |
| 1 | E1 kJ/mol              | 244.5840     | 329.6794     |         |         | +     | 0.1079    |
| 2 | React.ord. 1           | 0.6657       | 0.7978       |         |         |       | 4.0140E-2 |
| 3 | log Kcat 1             | 0.4500       | 0.2450       |         |         |       | 2.1284E-2 |
| 4 | Area 1/(J/g)           | 20.7742      | 20.7742      |         |         |       | constant  |

STATISTICS

Least squares: 7.18487E-2 Number of cycles: 23  
 Mean of residues: 1.57948E-2 Max.No of cycles: 50  
 Correlation coefficient: 0.999393 Rel. precision: 0.001000  
 Durbin-Watson Value: 0.057 t-critical(0.95;226): 1.962  
 Durbin-Watson Factor: 4.216

F-TEST ON FIT-QUALITY

| # | Code | Fexp | Fcrit(0.95) | f-act | Type 1 | Type 2 | Type 3 | Type 4 | Type 5 | Type 6 |
|---|------|------|-------------|-------|--------|--------|--------|--------|--------|--------|
| 0 | s:   | 1.00 | 1.25        | 226   | Cn B   |        |        |        |        |        |
| 1 | s:   | 1.23 | 1.25        | 228   | D3F    |        |        |        |        |        |
| 2 | s:   | 1.34 | 1.25        | 228   | D1F    |        |        |        |        |        |
| 3 | s:   | 3.16 | 1.25        | 227   | Fn     |        |        |        |        |        |
| 4 | s:   | 3.58 | 1.25        | 228   | R3     |        |        |        |        |        |

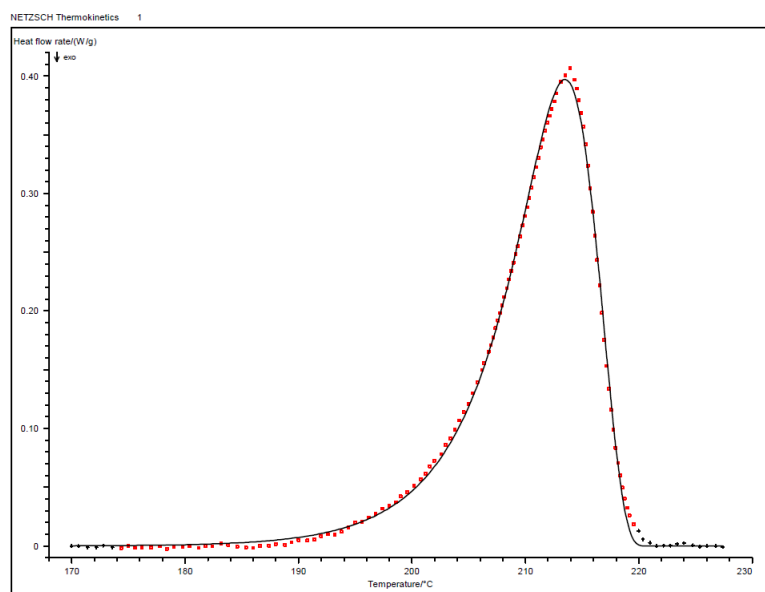



**NETZSCH Thermokinetics**

Date/Time: 03.02.2016 at 15:24

Project: 1

Model 1: n-th order with autocatalysis by B  $A \rightarrow 1 \rightarrow B$

Start evaluation: 0.00050 Measurement type: DSC  
 Fine evaluation: 0.99950  
 SCAN 1 Identity: Op 255 07.08.2015 15:45:53/Segm.S1/1  
 Transfer Corr: 204\_F1.kcr  
 Min. Temp/°C: 167.2805 Min. Time/min: 0.0  
 Max. Temp/°C: 227.2853 Max. Time/min: 4.9974  
 Heating rate/(K/min): 12.007 Sampling time/s: 0.999  
 Sample mass/mg: 1.310  
 Base line type: tangent area prop. LeftPts: 100 RightPts: 8

**PARAMETERS AND STANDARD DEVIATIONS**

| # | Parameter              | Initial Val. | Optimum Val. | Minimum | Maximum | Sigrt* | Std.Dev.  |
|---|------------------------|--------------|--------------|---------|---------|--------|-----------|
| 0 | log A1/s <sup>-1</sup> | 27.1547      | 27.6357      |         |         |        | 0.2931    |
| 1 | E1 kJ/mol              | 270.2481     | 274.7465     |         |         | +      | 2.6482    |
| 2 | React.ord. 1           | 0.7478       | 0.7946       |         |         |        | 5.4682E-2 |
| 3 | log Kcat 1             | 0.4500       | 0.5164       |         |         |        | 3.8482E-2 |
| 4 | Area 1/(J/g)           | 20.2956      | 20.2956      |         |         |        | constant  |

**STATISTICS**

Least squares: 5.96914E-2 Number of cycles: 18  
 Mean of residues: 1.40822E-2 Max.No of cycles: 50  
 Correlation coefficient: 0.999438 Rel. precision: 0.001000  
 Durbin-Watson Value: 0.035 t-critical(0.95;259): 1.960  
 Durbin-Watson Factor: 5.332

**F-TEST ON FIT-QUALITY**

| # | Code | Fexp | Fcrit(0.95) | f-ac1 | Type 1 | Type 2 | Type 3 | Type 4 | Type 5 | Type 6 |
|---|------|------|-------------|-------|--------|--------|--------|--------|--------|--------|
| 0 | s:   | 1.00 | 1.23        | 259   | Cn     | B      |        |        |        |        |
| 1 | s:   | 2.21 | 1.23        | 261   | D3F    |        |        |        |        |        |
| 2 | s:   | 4.54 | 1.23        | 260   | C1     | B      |        |        |        |        |
| 3 | s:   | 4.92 | 1.23        | 260   | Fn     |        |        |        |        |        |
| 4 | s:   | 5.32 | 1.23        | 261   | R3     |        |        |        |        |        |

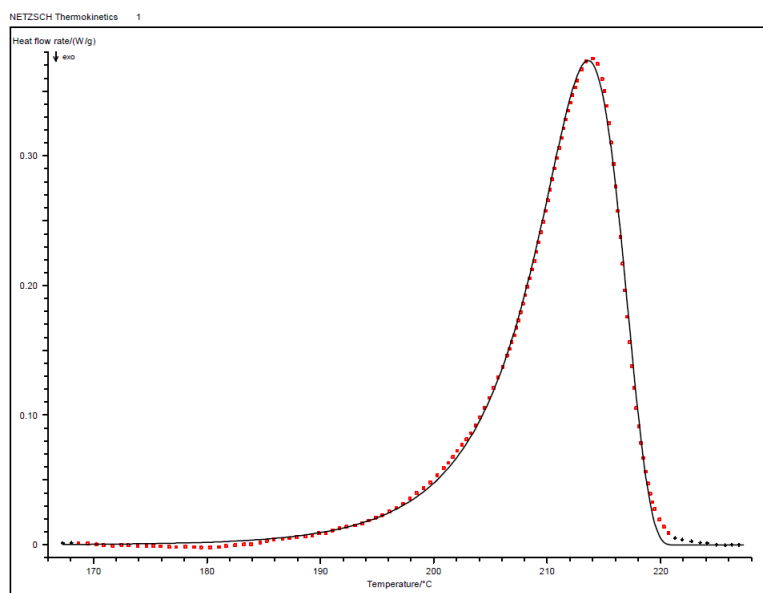

**NETZSCH Thermokinetics**

Date/Time: 17.02.2016 at 16:17

Project: 1

Model 1: n-th order with autocatalysis by B

A—1→B

|                       |            |                   |                               |
|-----------------------|------------|-------------------|-------------------------------|
| Start evaluation:     | 0.00050    | Measurement type: | DSC                           |
| Fine evaluation:      | 0.99950    |                   |                               |
| SCAN 1 Identity:      |            | Op 255            | 25.01.2016 11:29:15/Segm.S1/2 |
| Transfer Corr:        | 204_F1.kcr |                   |                               |
| Min. Temp/°C:         | 170.6458   | Min. Time/min:    | 0.0                           |
| Max. Temp/°C:         | 227.6546   | Max. Time/min:    | 6.3314                        |
| Heating rate/(K/min): | 9.004      | Sampling time/s:  | 1.333                         |
| Sample mass/mg:       | 1.310      |                   |                               |
| Base line type:       |            | LeftPts: 40       | RightPts: 20                  |

**PARAMETERS AND STANDARD DEVIATIONS**

| # | Parameter              | Initial Val. | Optimum Val. | Minimum | Maximum | Sigrt* | Std.Dev.  |
|---|------------------------|--------------|--------------|---------|---------|--------|-----------|
| 0 | log A1/s <sup>-1</sup> | 32.4585      | 25.3935      |         |         |        | 1.0839E-2 |
| 1 | E1 kJ/mol              | 316.6782     | 253.3513     |         |         | +      | 0.1381    |
| 2 | React.ord. 1           | 0.8798       | 0.8454       |         |         |        | 5.5051E-2 |
| 3 | log Kcat 1             | 0.4500       | 0.7229       |         |         |        | 1.6025E-2 |
| 4 | Area 1/(J/g)           | 19.3019      | 19.3019      |         |         |        | constant  |

**STATISTICS**

|                          |            |                       |          |
|--------------------------|------------|-----------------------|----------|
| Least squares:           | 5.86902E-2 | Number of cycles:     | 19       |
| Mean of residues:        | 1.43251E-2 | Max.No of cycles:     | 50       |
| Correlation coefficient: | 0.998946   | Rel. precision:       | 0.001000 |
| Durbin-Watson Value:     | 0.023      | t-critical(0.95;240): | 1.961    |
| Durbin-Watson Factor:    | 6.610      |                       |          |

**F-TEST ON FIT-QUALITY**

| # | Code | Fexp | Fcrit(0.95) | f-aci | Type 1 | Type 2 | Type 3 | Type 4 | Type 5 | Type 6 |
|---|------|------|-------------|-------|--------|--------|--------|--------|--------|--------|
| 0 | s:   | 1.00 | 1.24        | 240   | Cn     | B      |        |        |        |        |
| 1 | s:   | 1.10 | 1.24        | 242   | D1     | F      |        |        |        |        |
| 2 | s:   | 1.90 | 1.24        | 241   | C1     | B      |        |        |        |        |
| 3 | s:   | 3.04 | 1.24        | 242   | D3     | F      |        |        |        |        |
| 4 | s:   | 4.35 | 1.24        | 241   | Fn     |        |        |        |        |        |

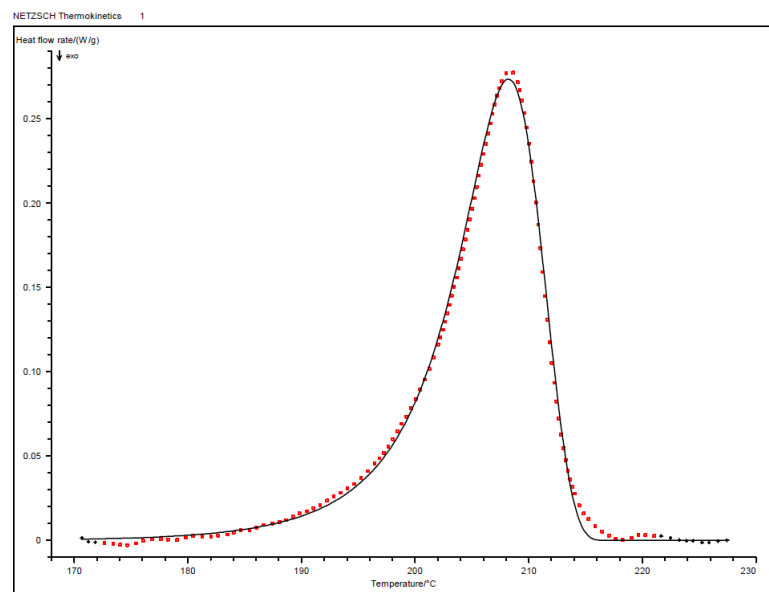

**NETZSCH Thermokinetics**

Date/Time: 17.02.2016 at 16:22

Project: 1

Model 1: n-th order with autocatalysis by B A→1→B

Start evaluation: 0.00050 Measurement type: DSC  
 Fine evaluation: 0.99950  
 SCAN 1 Identity: Op 255 09.02.2016 14:35:23/Segm.S1/2  
 Transfer Corr: 204\_F1.kcr  
 Min. Temp/°C: 178.9042 Min. Time/min: 0.0  
 Max. Temp/°C: 227.7066 Max. Time/min: 5.4200  
 Heating rate/(K/min): 9.004 Sampling time/s: 1.333  
 Sample mass/mg: 1.310  
 Base line type: LeftPts: 7 RightPts: 7

**PARAMETERS AND STANDARD DEVIATIONS**

| # | Parameter              | Initial Val. | Optimum Val. | Minimum | Maximum | Sigrt* | Std.Dev.  |
|---|------------------------|--------------|--------------|---------|---------|--------|-----------|
| 0 | log A1/s <sup>-1</sup> | 31.9239      | 34.2584      |         |         |        | 9.7746E-3 |
| 1 | E1 kJ/mol              | 313.7417     | 335.2166     |         |         | +      | 0.1397    |
| 2 | React.ord. 1           | 0.8398       | 0.8801       |         |         |        | 5.3690E-2 |
| 3 | log Kcat 1             | 0.4500       | 0.4918       |         |         |        | 1.7832E-2 |
| 4 | Area 1/(J/g)           | 20.9336      | 20.9336      |         |         |        | constant  |

**STATISTICS**

Least squares: 7.67039E-2 Number of cycles: 22  
 Mean of residues: 1.76940E-2 Max.No of cycles: 50  
 Correlation coefficient: 0.999094 Rel. precision: 0.001000  
 Durbin-Watson Value: 0.036 t-critical(0.95;208): 1.963  
 Durbin-Watson Factor: 5.327

**F-TEST ON FIT-QUALITY**

| # | Code | Fexp | Fcrit(0.95) | f-act | Type 1 | Type 2 | Type 3 | Type 4 | Type 5 | Type 6 |
|---|------|------|-------------|-------|--------|--------|--------|--------|--------|--------|
| 0 | s:   | 1.00 | 1.26        | 208   | Cn     | B      |        |        |        |        |
| 1 | s:   | 1.64 | 1.26        | 209   | C1     | B      |        |        |        |        |
| 2 | s:   | 2.10 | 1.26        | 210   | D1     | F      |        |        |        |        |
| 3 | s:   | 2.67 | 1.26        | 210   | D3     | F      |        |        |        |        |
| 4 | s:   | 3.16 | 1.26        | 209   | Fn     |        |        |        |        |        |

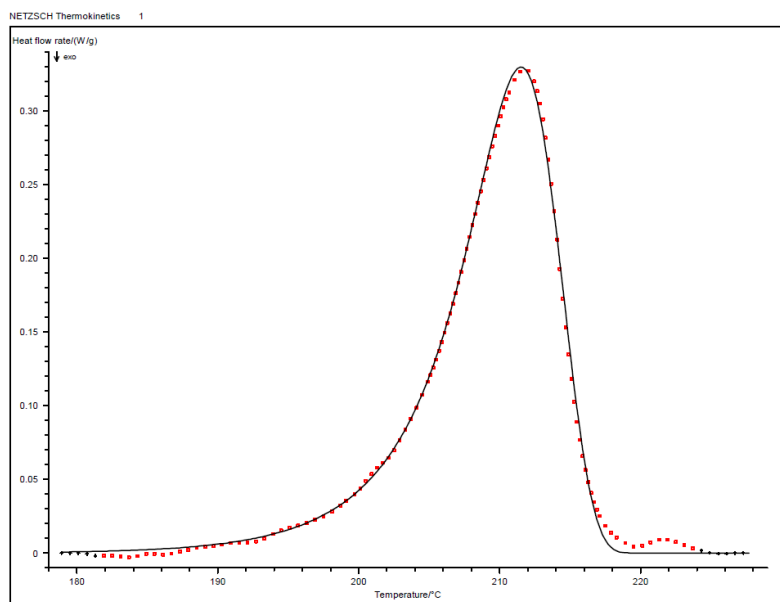

**NETZSCH Thermokinetics**

Date/Time: 17.02.2016 at 16:14

Project: 1

Model 1: n-th order with autocatalysis by B

A → 1 → B

|                       |            |                   |                               |
|-----------------------|------------|-------------------|-------------------------------|
| Start evaluation:     | 0.00050    | Measurement type: | DSC                           |
| Fine evaluation:      | 0.99950    |                   |                               |
| SCAN 1 Identity:      | 204_F1.kcr | Op 255            | 15.02.2016 11:04:33/Segm.S1/1 |
| Transfer Corr:        | 204_F1.kcr |                   |                               |
| Min. Temp/°C:         | 168.3587   | Min. Time/min:    | 0.0                           |
| Max. Temp/°C:         | 227.7710   | Max. Time/min:    | 6.5989                        |
| Heating rate/(K/min): | 9.003      | Sampling time/s:  | 1.333                         |
| Sample mass/mg:       | 1.310      |                   |                               |
| Base line type:       |            | LeftPts: 40       | RightPts: 20                  |

**PARAMETERS AND STANDARD DEVIATIONS**

| # | Parameter              | Initial Val. | Optimum Val. | Minimum | Maximum | Sigrt* | Std.Dev.  |
|---|------------------------|--------------|--------------|---------|---------|--------|-----------|
| 0 | log A1/s <sup>-1</sup> | 24.3825      | 27.8470      |         |         |        | 1.4435E-2 |
| 1 | E1 kJ/mol              | 244.0075     | 275.0898     |         |         | +      | 0.2078    |
| 2 | React.ord. 1           | 0.8846       | 0.9221       |         |         |        | 5.8005E-2 |
| 3 | log Kcat 1             | 0.4500       | 0.3416       |         |         |        | 1.3331E-2 |
| 4 | Area 1/(J/g)           | 19.6107      | 19.6107      |         |         |        | constant  |

**STATISTICS**

|                          |            |                       |          |
|--------------------------|------------|-----------------------|----------|
| Least squares:           | 8.34402E-3 | Number of cycles:     | 22       |
| Mean of residues:        | 5.29151E-3 | Max.No of cycles:     | 50       |
| Correlation coefficient: | 0.999784   | Rel. precision:       | 0.001000 |
| Durbin-Watson Value:     | 0.013      | t-critical(0.95;207): | 1.963    |
| Durbin-Watson Factor:    | 8.953      |                       |          |

**F-TEST ON FIT-QUALITY**

| # | Code | Fexp  | Fcrit(0.95) | f-act | Type 1 | Type 2 | Type 3 | Type 4 | Type 5 | Type 6 |
|---|------|-------|-------------|-------|--------|--------|--------|--------|--------|--------|
| 0 | s:   | 1.00  | 1.26        | 207   | Cn     | B      |        |        |        |        |
| 1 | s:   | 2.42  | 1.26        | 208   | C1     | B      |        |        |        |        |
| 2 | s:   | 8.24  | 1.26        | 208   | Fn     |        |        |        |        |        |
| 3 | s:   | 11.82 | 1.26        | 209   | D1     | F      |        |        |        |        |
| 4 | s:   | 12.62 | 1.26        | 209   | D3     | F      |        |        |        |        |

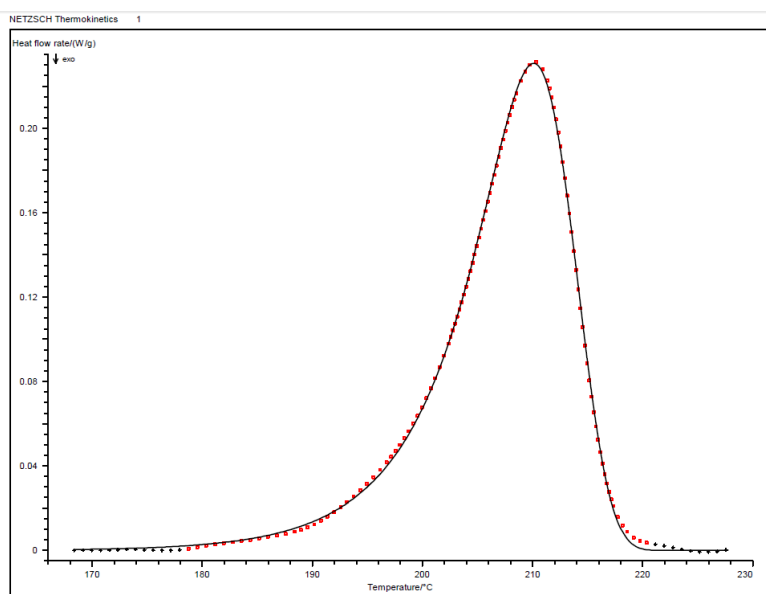

**Table S1** Kinetic data for the  $1^{A/LS} \rightarrow 1^{A/HS}$  spin transition used for statistical treatment.

| Sample / cycle | T / K | lnk               |
|----------------|-------|-------------------|
| 14-1 8up       | 490   | -5,84031071006496 |
| 14-1 10up      | 490   | -6,20593403052753 |
| 14-1 11up      | 490   | -5,96103575448239 |
| 14-1 12up      | 480   | -8,71262831901017 |
| 14-1 13up      | 480   | -8,2286500400255  |
| 14-1 14up      | 470   | -10,5888404984096 |
| 9 9up          | 490   | -5,48416574742023 |
| 9 10up         | 490   | -6,6346868462134  |
| 9 11up         | 490   | -5,57889824174886 |
| 9 12up         | 490   | -6,52277880883521 |
| 9 13up         | 490   | -6,02208370503121 |
| 9 15up         | 490   | -6,49910948319672 |
| 9 16up         | 490   | -5,57404085879939 |
| 9 17up         | 490   | -5,231248079223   |
| 9 18up         | 490   | -6,29174697676658 |
| 9 19up         | 490   | -6,02351691084237 |
| 9 20up         | 486   | -7,13140358649842 |
| 9 21up         | 486   | -6,91725149236731 |
| 9 22up         | 490   | -6,64243541052565 |
| 9 23up         | 490   | -6,1302644437726  |
| 9 24up         | 482   | -8,16959145138272 |
| 9 25up         | 482   | -7,39591260206566 |
| 9 26up         | 488   | -6,43992377990681 |
| 9 27up         | 488   | -5,95110743785233 |
| 9 29up         | 486   | -7,06430816070237 |
| 9 30up         | 486   | -6,3500712174346  |
| 9 31up         | 486   | -5,94771094001058 |
| 9 32up         | 482   | -7,95011388521457 |
| 9 33up         | 482   | -7,34016942269996 |
| 9 35up         | 484   | -7,57335126044111 |
| 9 36up         | 484   | -6,9161212105586  |
| 4 3up          | 490   | -6,05392950616651 |
| 4 4up          | 486   | -5,86788686302251 |
| 4 5up          | 481   | -6,53206813716982 |
| 4 6up          | 480   | -6,79749653717208 |
| 4 7up          | 480   | -6,03760876988061 |
| 4 8up          | 480   | -6,85222432078106 |
| 4 9up          | 480   | -6,73902939576851 |
| 4 11up         | 476   | -6,78950247316817 |
| 4 12up         | 476   | -6,60925847799666 |
| 4 14up         | 476   | -7,28012201817765 |
| 4 15up         | 476   | -7,19987301770959 |
| 4 16up         | 476   | -7,18177539254028 |
| 4 18up         | 476   | -6,91467660891807 |
| 4 19up         | 476   | -6,96945581500806 |

|          |     |                   |
|----------|-----|-------------------|
| 5-1 4up  | 490 | -5,96378295969458 |
| 5-1 5up  | 486 | -6,17323681761731 |
| 5-1 6up  | 482 | -7,23978905220486 |
| 5-1 7up  | 482 | -7,60498546822286 |
| 5-1 8up  | 482 | -7,7995676943524  |
| 5-1 9up  | 486 | -7,50924566326606 |
| 5-1 10up | 486 | -7,17641626162313 |
| 5-1 11up | 486 | -7,50653845111657 |
| 5-1 13up | 486 | -7,44486388227383 |
| 5-1 14up | 486 | -7,63355458874244 |
|          |     |                   |
| 7 2up    | 490 | -6,59463770970799 |
| 7 3up    | 490 | -6,07681767844366 |
| 7 4up    | 480 | -6,44103629288871 |
| 7 5up    | 472 | -6,98428555438464 |
| 7 6up    | 472 | -6,92861294503387 |
| 7 9up    | 460 | -7,29846786232034 |
| 7 10up   | 460 | -8,00741111423426 |
| 7 11up   | 460 | -7,95373919263168 |
| 7 12up   | 460 | -7,87299751193767 |
|          |     |                   |
| 3 3up    | 467 | -7,09437069736075 |
| 3 4up    | 450 | -7,40546586662822 |
| 3 5up    | 450 | -7,66862748411647 |
| 3 6up    | 467 | -6,50999880441026 |
| 3 7up    | 450 | -7,32391482934197 |
| 3 8up    | 440 | -7,78614959283031 |
| 3 9up    | 467 | -6,55081390262655 |
| 3 11up   | 450 | -7,37041027790588 |
| 3 12up   | 450 | -6,4749953855373  |
| 3 16up   | 450 | -7,24965361365363 |
| 3 17up   | 450 | -7,47644458704323 |
|          |     |                   |
| 1 2up    | 400 | -5,1760249050894  |
| 1 3up    | 395 | -5,61752142129896 |
| 1 4up    | 399 | -5,25830122391698 |
| 1 5up    | 395 | -5,96224850601522 |
| 1 8up    | 397 | -6,03568446581141 |
| 1 11up   | 397 | -6,00208784801065 |
